# Supplementary material for: Incidence, comorbidity and mortality in patients with necrotising soft-tissue infections, 2005–2018: a Danish nationwide register-based cohort study
Source: PubMed Central journal article supplement — BMJ Open. 2020 Oct 16;10(10):e041302. doi: 10.1136/bmjopen-2020-041302 (PMC7569942; doi:10.1136/bmjopen-2020-041302), 2020-10-16
Supplement: bmjopen-2020-041302.draft_revisions.pdf [file bmjopen-2020-041302.draft_revisions.pdf]

# BMJ Open

BMJ Open is committed to open peer review. As part of this commitment we make the peer review history of every article we publish publicly available.

When an article is published we post the peer reviewers' comments and the authors' responses online. We also post the versions of the paper that were used during peer review. These are the versions that the peer review comments apply to.

The versions of the paper that follow are the versions that were submitted during the peer review process. They are not the versions of record or the final published versions. They should not be cited or distributed as the published version of this manuscript.

BMJ Open is an open access journal and the full, final, typeset and author-corrected version of record of the manuscript is available on our site with no access controls, subscription charges or pay-per-view fees (<http://bmjopen.bmj.com>).

If you have any questions on BMJ Open's open peer review process please email [info.bmjopen@bmj.com](mailto:info.bmjopen@bmj.com)

# BMJ Open

## Incidence, comorbidity and mortality in patients with necrotizing soft tissue infections, 2005–2018: A Danish nationwide register-based cohort study

|                               |                                                                                                                                                                                                                                                                                                                                        |
|-------------------------------|----------------------------------------------------------------------------------------------------------------------------------------------------------------------------------------------------------------------------------------------------------------------------------------------------------------------------------------|
| Journal:                      | <i>BMJ Open</i>                                                                                                                                                                                                                                                                                                                        |
| Manuscript ID                 | bmjopen-2020-041302                                                                                                                                                                                                                                                                                                                    |
| Article Type:                 | Original research                                                                                                                                                                                                                                                                                                                      |
| Date Submitted by the Author: | 04-Jun-2020                                                                                                                                                                                                                                                                                                                            |
| Complete List of Authors:     | Hedetoft, Morten; Copenhagen University Hospital, Dept. of Anaesthesia<br>Madsen, Martin; Copenhagen University Hospital, Department of Intensive Care, 4131, Rigshospitalet<br>Madsen, Lærke; Copenhagen University Hospital, Department of Anaesthesia<br>Hyldegaard, Ole; Copenhagen University Hospital, Department of Anaesthesia |
| Keywords:                     | EPIDEMIOLOGY, INFECTIOUS DISEASES, Adult intensive & critical care < INTENSIVE & CRITICAL CARE, Adult surgery < SURGERY                                                                                                                                                                                                                |
|                               |                                                                                                                                                                                                                                                                                                                                        |

SCHOLARONE™  
Manuscripts

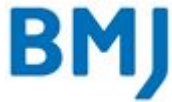

I, the Submitting Author has the right to grant and does grant on behalf of all authors of the Work (as defined in the below author licence), an exclusive licence and/or a non-exclusive licence for contributions from authors who are: i) UK Crown employees; ii) where BMJ has agreed a CC-BY licence shall apply, and/or iii) in accordance with the terms applicable for US Federal Government officers or employees acting as part of their official duties; on a worldwide, perpetual, irrevocable, royalty-free basis to BMJ Publishing Group Ltd ("BMJ") its licensees and where the relevant Journal is co-owned by BMJ to the co-owners of the Journal, to publish the Work in this journal and any other BMJ products and to exploit all rights, as set out in our [licence](#).

The Submitting Author accepts and understands that any supply made under these terms is made by BMJ to the Submitting Author unless you are acting as an employee on behalf of your employer or a postgraduate student of an affiliated institution which is paying any applicable article publishing charge ("APC") for Open Access articles. Where the Submitting Author wishes to make the Work available on an Open Access basis (and intends to pay the relevant APC), the terms of reuse of such Open Access shall be governed by a Creative Commons licence – details of these licences and which [Creative Commons](#) licence will apply to this Work are set out in our licence referred to above.

Other than as permitted in any relevant BMJ Author's Self Archiving Policies, I confirm this Work has not been accepted for publication elsewhere, is not being considered for publication elsewhere and does not duplicate material already published. I confirm all authors consent to publication of this Work and authorise the granting of this licence.

# Incidence, comorbidity and mortality in patients with necrotizing soft tissue infections, 2005–2018: A Danish nationwide register-based cohort study

Morten Hedetoft<sup>1</sup>, Martin Bruun Madsen<sup>2</sup>, Lærke Bruun Madsen<sup>1</sup>, Ole Hyldegaard<sup>1</sup>

<sup>1</sup>Department of Anaesthesia, Centre of Head and Orthopaedics, Copenhagen University Hospital, Rigshospitalet, Copenhagen, Denmark

<sup>2</sup>Department of Intensive Care, Copenhagen University Hospital, Rigshospitalet, Copenhagen, Denmark.

## Abstract

*Objective:* To assess the incidence, comorbidities, treatment modalities and mortality in patients with necrotizing soft tissue infections (NSTIs) in Denmark.

*Design:* Nationwide population-based registry study.

*Setting:* Denmark.

*Participants:* Danish residents with NSTI between 1 January 2005 and 31 August 2018.

*Main outcome measure:* Incidence of disease per 100,000 person/year and all-cause mortality at day 90 obtained from Danish National Patient Registry and the Danish Civil Registration System.

*Results:* 1,527 patients with NSTI were identified, yielding an incidence of 1.99 per 100,000 person/year. All-cause 30-day, 90-day and 1-year mortality were 19.4% (95% CI: 17.4 to 21.5), 25.2% (95% CI: 23.1 to 27.5) and 30.4% (95% CI: 28.0 to 32.8), respectively. Amputation occurred in 7% of the individuals. Diabetes was the most predominant comorbidity affecting 43% of the cohort, while 26% had no comorbidities. Higher age, female sex and increasing comorbidity index were found to be independent risk factors of mortality. Admission to high-volume hospitals was associated with improved survival (OR 0.59, 95% CI 0.45 to 0.77). Thirty-six percent received hyperbaric oxygen therapy (HBOT) as an adjunctive therapy. No change in overall mortality was found over the studied time period.

*Conclusion:* The present study found that in Denmark, the incidence of NSTI increased; mortality rates remained high and largely unaltered. Diabetes was the most common comorbidity, while higher age, female sex and increasing comorbidity index were associated to increased mortality. Survival was improved in those admitted to hospitals with more expertise in treating NSTI. HBOT was frequently used as an adjunct.

*Keywords:* Necrotizing Soft Tissue Infection; Incidence; Comorbidity; Survival

1  
2  
3  
4  
5  
6  
7  
8  
9  
10  
11  
12  
13  
14  
15  
16  
17  
18  
19  
20  
21  
22  
23  
24  
25  
26  
27  
28  
29  
30  
31  
32  
33  
34  
35  
36  
37  
38  
39  
40  
41  
42  
43  
44  
45  
46  
47  
48  
49  
50  
51  
52  
53  
54  
55  
56  
57  
58  
59  
60

#### Strengths and limitations of this study

- All data linked on an individual level across registries with a substantial high follow-up rate.
- Nationwide cohort resulting in a precise estimate of national incidence, demographics and outcomes in contrast to observational studies.
- Inclusion of more than 1,500 patients with NSTI across a 14-year time period: a relatively large sample size considering the rarity of disease.
- No clinical variables describing the severity of illness were obtainable from the registries, and so there may have been a subsequent lack of important factors that could have been built into the statistical models.

For peer review only

## Introduction

Necrotizing soft tissue infection (NSTI) is a severe disease associated with substantial morbidity and mortality. NSTI is characterized by rapidly-progressing soft tissue inflammation and necrosis [1]. The infection can be either mono- or polymicrobial, caused by numerous organisms but most commonly by group A streptococcus [2]. Immediate, aggressive, and radical surgical debridement is key in the management of NSTI. Despite rigorous treatment, patients with NSTI have high mortality rates, risk of amputation, and often have prolonged hospital and rehabilitation stays. Mortality rates can be markedly different (6–41%) [3–7], but a recent, large prospective multicenter study demonstrated a 90-day mortality of 18%, which included the use of adjuvant therapies such as intravenous immunoglobulin (IVIG) and hyperbaric oxygen therapy (HBOT) [2]. Retrospective studies and pathophysiological reasoning have indicated that a delay to the first surgical debridement is associated with increased mortality [10–13]. Surgery should be accompanied by broad-spectrum antibiotics and supportive intensive care, which taken together remain the standard of care in the treatment of NSTI.

HBOT has been advocated as adjunctive therapy to the multidisciplinary course of treatment for NSTI and has in retrospective studies been shown to reduce mortality, particularly in the most critically ill patients [14–16]. As with most other treatment interventions in these patients, no randomized clinical trials investigating the effects of HBOT in these patients have been made [17]. Only 1% of patients with NSTI in the United States received HBOT at specialized centres [16] and although the use of HBOT is not universally accepted as a routine clinical treatment for this disease [18,19], most retrospective clinical studies and larger database studies combined with a large body of preclinical data, may justify its current use as adjuvant therapy to surgery, antibiotic therapy and intensive care support [2-5].

In Denmark, few major teaching hospitals receive patients with NSTI from other hospitals for multidisciplinary care. Of these, one receives patients from all parts of the country for centralized treatment using a multidisciplinary protocol, including HBOT [2]. This should be of benefit, as an increased rate of survival has been shown in patients with NSTI who are treated in high-volume NSTI centers where expertise can be developed [20]. However, as many patients with NSTI have septic shock and multiple organ failure, the delayed time taken for transportation to a centralized treatment hospital by air or road ambulance can pose a risk to life and therefore, is not always feasible.

The epidemiology of NSTI in Denmark has never been fully described, and its nationwide incidence and mortality is unknown. Furthermore, it is not known how many patients are transferred after initial

1  
2  
3  
4 treatment to a centralized hospital for a multidisciplinary approach, or how many receive HBOT; few  
5 centres can offer HBOT to critically ill patients. The aim of this study was to evaluate NSTI incidence and  
6 mortality in Denmark with special attention to patients receiving centralized, multidisciplinary treatment,  
7 including adjuvant HBOT.  
8  
9  
10

## 11 **Material and Methods**

### 12 *Setting.*

13  
14 This was a nationwide population-based registry study of patients diagnosed with NSTI between 1 January  
15 2005 and 31 August 2018 in Denmark. Data were obtained from the Danish National Patient Registry  
16 (DNPR) [21], the Danish Civil Registration System (CRS) [22] and the Cause of Death Register (CDR) [23]. By  
17 law, public hospitals in Denmark are required to prospectively report data to these registries. All data were  
18 linked to each separate individual using a unique 10-digit number assigned to every Danish resident living in  
19 Denmark and non-Danish citizens patients treated in Denmark.  
20  
21  
22  
23  
24  
25  
26

### 27 *Data collection.*

28  
29 All NSTI cases in Denmark were identified from the DNPR using International Classification of Diseases-10  
30 (ICD10) codes; M726 (necrotizing fasciitis), M725A (necrotizing fasciitis, before 2012), N498C (Fournier's  
31 gangrene) and A480 (gas gangrene). DNPR includes information on hospital contacts, procedures,  
32 diagnostic codes, admission, and discharge dates on an individual level. To classify comorbidities, diagnoses  
33 were obtained from the DNPR, using the Charlson Comorbidity Index, a well-established classification  
34 including more than 17 medical conditions [24]. A weighted Charlson Comorbidity Index was also used, as it  
35 has shown good discrimination when predicting in-hospital mortality [25]. We included comorbidity  
36 diagnoses from 10 years prior to the NSTI diagnosis.  
37  
38  
39  
40  
41  
42  
43  
44

45 Data obtained from the CRS included information on sex, date of birth, vital status, date of death or  
46 emigration from Denmark. The CDR was used to gain information on cause of death on an individual level.  
47 In order to define a 'high-volume NSTI hospital', we identified the lowest number of NSTI patients treated  
48 yearly at one of the three major teaching hospitals in Denmark. In assessing procedures related to the NSTI  
49 diagnosis, we chose to include only data on surgical interventions, supportive modalities and procedures  
50 made within seven days of NSTI diagnosis.  
51  
52  
53  
54  
55

56 The present study was approved by The Danish Data Protection Agency (P-2019-153) and the Danish Health  
57 Data Authority (FSEID-0004419). According to Danish law, the use of observational data from approved  
58  
59  
60

registries does not require ethical approval or informed consent. The study was written in compliance with the Reporting of Studies Conducted using Observational Routinely-collected health Data (RECORD) statement [26] (Supplementary appendix 1). The ICD-10 codes used for extraction of comorbidities are found in the Supplementary appendix 2, and the Health Authorities Classification System (SKS)-codes used for extraction of procedures (surgery and medical procedures/treatments) in Supplementary appendix 3.

For those readers with a special interest, the quality of the DNPR and introduction to the Danish SKS-classification system has been reviewed by Schmidt M et al. [21].

### *Patient and Public Involvement*

No patients were involved in the design, implementation, or dissemination of the results from the present study.

### *Statistical analysis.*

We expressed category characteristics and outcomes as absolute numbers (%) and continuous data was reported as medians (interquartile range [IQR]). Annual incidence was expressed as cases per 100,000 persons per year. Mortality rates were presented as percentages with 95% confidence intervals (CI). Comparisons were performed using Wilcoxon Rank Sum Test for quantitative data and Fisher's exact test for categorical data.

Unadjusted and adjusted multivariable logistic regression models were built to identify risk factors associated with increased mortality. All models included age, sex, and weighted Charlson Comorbidity Index as covariates. Additionally, 'hospital category' and 'number of HBOTs' were included as covariates after showing significant association with survival in univariate analyses. P-values were reported as exact values unless they were <0.001. P-values <0.05 were considered statistically significant. Patients who were lost to follow-up or missing data were excluded from analysis. Statistical analyses were performed with RStudio version 1.0.153 (RStudio, Inc.) and GraphPad Prism version 8.0.2 (GraphPad Inc., La Jolla, Ca, USA).

### **Results**

A total of 1,527 patients with NSTI were identified between 1 of January 2005 and 31 of August 2018, yielding a nationwide NSTI incidence of 1.99 per 100,000 person/year (95%CI: 1.79 to 2.19). Over the period of the study, a trend to an increased number of annual NSTI cases (0.06 per 100.000 person/year, 95%CI: 0.02 to 0.10) was noted (fig 1).



1  
2  
3  
4  
5  
6  
7  
8  
9  
10  
11  
12  
13  
14  
15  
16  
17  
18  
19  
20  
21  
22  
23  
24  
25  
26  
27  
28  
29  
30  
31  
32  
33  
34  
35  
36  
37  
38  
39  
40  
41  
42  
43  
44  
45  
46  
47  
48  
49  
50  
51  
52  
53  
54  
55  
56  
57  
58  
59  
60

Patient median age was 62 (IQR: 50–72), of which 63% were male. Of the 1,527 patients included, 1,303 (85%) were registered with the diagnosis of necrotizing fasciitis, 155 (10%) with Fournier’s gangrene and 362 (24%) with gas gangrene. Two hundred and forty-four (16%) patients were registered with more than one of the diagnoses. A total of 260 (17%) had surgery within 4 weeks before the NSTI diagnosis. Characteristics including comorbidities, hospital category and supportive modalities are presented in Table 1. During the first 90 days after NSTI diagnosis, the median number of days alive and out of hospital were 55 (IQR: 10–76).

### *Interventions and Supportive Modalities*

The majority (1506/1527; 99%) of patients were admitted to an intensive care unit, with 86% being mechanically ventilated and 72% treated with vasopressor/inotrope (Table 2). Two hundred and sixty-eight patients (18%) were treated with renal-replacement therapy (at least one treatment with either hemodialysis or continuous renal-replacement therapy) and 554 (36%) patients were treated with HBOT. These patients received their first HBOT after a median of 4.2 (IQR 2.1-6.2) hours from diagnosis at the admitting hospital. They received a median of three HBOT sessions (IQR 2-3), and 45% received two or more HBOT sessions within 24 hours after arrival. The remaining 974 (64%) patients did not receive HBOT as a treatment modality for their NSTI.

A total of 111 (7%) patients underwent at least one type of amputation within 7 days of NSTI diagnosis. Amputation of the upper leg was the most common, and was seen in 73 (5%) patients, followed by amputation of the lower leg (n=18, 1%), upper arm (n=11, <1%), penis (n=6, <1%), lower arm (n=3, <1%), foot (n=3, <1%) and hand (n=1, <1%). Four patients underwent more than one type of amputation.

### *Mortality*

Six patients were lost to follow-up at Day 90, resulting in a 99.6% follow-up rate. These patients were excluded from the survival analyses. In total, 295 patients died within 30 days of diagnosis (19.4%, 95% CI: 17.4 to 21.5) and 384 within 90 days (25.2%, 95% CI: 23.1 to 27.5) (fig 2). As patients who entered the study in 2018 have not been studied for a full year when the study was ended, these patients were excluded from assessment of 1-year mortality. Of the 1,429 individuals enrolled from 2005 to 2017, 1-year mortality was 30.4% (95% CI: 28.0 to 32.8). Patients who did not survive until Day 30 died after a median of 4 days [IQR: 1-11]. Patients with no previous comorbidities had a 30-day, 90-day and 1-year mortality rate of 11.4%

(95% CI 8.5 to 15.0), 13.7% (95% CI 10.5 to 17.5) and 15.4% (95% CI 11.8 to 19.5), respectively. Mortality rates by comorbidity groups are presented in Table 3.

Multivariable logistic regression models showed that factors associated with an increased 90-day mortality were increasing age, female sex, increased weighted Charlson index and treatment exclusively at low-volume NSTI hospitals (Table 4). Receiving two or more HBOT sessions within 24 hours from diagnosis was not significant in either unadjusted or adjusted analyses. In unadjusted analysis, patients receiving three HBOT sessions had a significantly decreased risk of death ( $p=0.03$ ) compared to other HBOT-treated patients. However, this was not significant after adjustment for age, sex, and comorbidities ( $p=0.07$ ). No improved overall survival was found from 2012–2018 compared to 2005–2011 (Table 4).

Three high-volume NSTI hospitals (>8 NSTI cases/annually) were identified. Patients treated at one high-volume NSTI hospital offering HBOT as an adjunct ( $n=859$ , including 554 HBOT-treated), had significant decreased risk of death compared to patients treated at one high-volume, non-HBOT hospital ( $n=125$ ) with Odds Ratios (OR) for 30-day mortality and 90-day mortality of 0.54 (95%CI 0.33 to 0.91,  $p=0.02$ ) and of 0.61 (95%CI 0.39 to 0.97,  $p=0.03$ ), respectively. No differences were found in age, sex, or weighted comorbidity index between these high-volume hospitals ( $p=0.18$ ,  $p=0.77$  and  $p=0.06$ , respectively). The 30-day non-survivors died after a median of 4 and 5 days in these two hospital categories.

HBOT-treated NSTI patients had a 30-day mortality of 7.4% (95%CI 5.4 to 9.9) and a 90-day mortality of 13.9 (95%CI 11.1 to 17.1). "Necrotizing fasciitis" (M726/725) was the single most reported cause of death at Day 90 ( $n=84$ ) followed by "Other fibroblastic disorders" (M728) ( $n=16$ ) and "Sepsis, unspecified organism" (A419) ( $n=13$ ).

### **Discussion**

The Danish registries that were used in the present study are unique, in that they can link clinical information to an individual level. Using data drawn from these databases, we studied patients with NSTI in Denmark between 1 January 2005 and 31 August 2018. We found a mean incidence of NSTI of 1.99 per 100,000 inhabitants/year; In a study from Northern Thailand, incidence rates as high as 15.5 per 100,000 inhabitants/year have been observed [27], but the present results are similar to those of New Zealand (1.69 per 100,000 inhabitants/year) [28] and Western Norway (3.0 per 100,000) [29].

1  
2  
3  
4 During the observation period of approximately 14 years, the incidence of NSTI appeared to increase.  
5 Numerous factors may have influenced this finding, including increased awareness of NSTI [30] and  
6 changes in the practice of registering diagnoses. However, the trend could represent a true increase in  
7 disease incidence, similar to that observed in the United States and New Zealand [28,31]. We found an all-  
8 cause 30-day, 90-day and 1-year mortality rate of 19%, 25% and 30%, respectively. In other retrospective  
9 studies, mortality varies considerably, with values as high as 41% [7]. The 30-day rate found in the present  
10 study is similar to the 28-day mortality rate of 18% reported in a recent French registry study [20] but is  
11 substantially higher than an overall mortality of 5–10% reported in a registry study including more than  
12 45,913 NSTI patients [16]. NSTI is rare and no diagnostic criteria exist; in general, the diagnosis is made by  
13 the surgeon during surgery. Different classifications are based on location, eponyms, and etiology. The  
14 noticeable difference in mortality among studies could reflect the heterogeneity of NSTI patients, but also  
15 the complexity of diagnosing NSTI. In our study, 16% of patients had more than one of three codes  
16 registered, confirming this complexity. Factors independently associated with higher mortality at Day 90  
17 were older age, female sex, increasing weighted Charlson Index and treatment exclusively at low-volume  
18 NSTI hospitals. Increasing age has been reported as a risk factor of death in numerous of studies, but  
19 conflicting evidence exists as to whether female sex is an independent risk factor or not [2,20].  
20  
21  
22  
23  
24  
25  
26  
27  
28  
29  
30  
31  
32

33 Approximately 30% of patients in the present cohort had septic shock; this value is lower than reported  
34 recently in a prospective observational study including Scandinavian high-volume hospitals, where 50% had  
35 septic shock [2]. Data from the DNPR has shown positive predictive values of 69–82% for septic shock  
36 diagnoses, which might explain this difference [32]. However, it is possible that as the hospitals in the  
37 Scandinavian study were high-volume and took in a disproportionately large number of severe cases  
38 (including septic shock for example), the findings are not directly comparable; the present cohort included  
39 all cases, including patients that were not transferred to specialized centres, and thereby represents the  
40 overall nationwide incidence. Additional selection bias for severe cases might also be imposed by transport  
41 time, as the most severe cases may not be transferred to specialized centres possibly due to transportation  
42 constituting a risk in itself. Despite declining mortality rates among patients with sepsis in general [33,34],  
43 NSTI still remains a substantial risk of death. In accordance with existing literature [20] we did not find any  
44 significant improvement in NSTI survival over the years studied.  
45  
46  
47  
48  
49  
50  
51  
52  
53

54 Admission to hospitals managing  $\geq 8$  NSTI cases annually in this cohort was associated with lower mortality.  
55 Admission to hospitals ( $\geq 3$  NSTI patients per year) was also associated with lower mortality in France [20].  
56 These findings might reflect a greater level of expertise in high-volume hospitals, which are also often able  
57  
58  
59  
60

1  
2  
3  
4 to offer immediate access to operating theaters and intensive care units with experienced professionals,  
5 including microbiologists, infectious disease specialists and dermatologists, at all hours. In deriving our  
6 definition of a high-volume NSTI hospital in Denmark, we used a cut-off value that represented the lowest  
7 number of NSTI cases treated at one of the three major teaching hospitals in Denmark. These hospitals are  
8 the most highly-specialized in the country, with optimal clinical care including a multidisciplinary approach  
9 in the treatment of NSTI [18].  
10  
11  
12  
13  
14

15  
16 Although diabetes may remain a significant burden of disease, it has not been associated with higher  
17 mortality rates in NSTI [2]. Diabetes was the most common comorbidity, affecting 43% of patients, followed  
18 by 22% with cancer and 19% with chronic pulmonary disease. This varied considerably in comparison to a  
19 large French registry study where 29% of patients had diabetes and 9% had cancer [20]. The values from  
20 our study are not extraordinarily high, however, the proportion of patients with diabetes affected by NSTI  
21 has been reported in previous studies to be as high as 71% [10]. We used the Charlson Comorbidity Index  
22 [24] to address burden of diseases, as it is one of the most frequently used comorbidity indexes, especially  
23 in survival analysis of cancer [35–37]. However, the index also predicts 30-day and 1-year mortality in  
24 intensive care patients, which the results from the present cohort is consistent with [38]. For ease of  
25 comparison between studies, we reported the Quan's weighted Charlson comorbidity score, as it is  
26 increasingly reported as the only comorbidity variable [25,39].  
27  
28  
29  
30  
31  
32  
33  
34  
35

36 A 98% positive predictive value has been shown for the Charlson's conditions obtained from the DNPR [40].  
37 Surprisingly, 26% of the patients (n=398) did not have any comorbidities at time of NSTI diagnosis.  
38 Validation of the Charlson Comorbidity Index showed an in-hospital mortality of 0.4-2.6% in patients with a  
39 comorbidity score of zero. This contrasts with an 11% 30-day mortality among patients with no  
40 comorbidities in the present cohort and highlights the severity of the NSTI even for those without pre-  
41 existing disease. Recent surgical interventions do pose a risk factor of developing NSTI [1] and nearly one  
42 fifth (17%) of the cohort had had surgery within four weeks before NSTI was diagnosed.  
43  
44  
45  
46  
47  
48

49 An improved 30 and 90-day survival in hospitals offering HBOT as an adjunct to the multidisciplinary  
50 treatment was noted. However, these results should be interpreted cautiously due to missing confounders,  
51 such as clinical variables and potentially different treatment modalities across hospitals. Mortality among  
52 HBOT-treated individuals was noticeably reduced compared to those who did not receive HBOT. This could  
53 indicate that HBOT provides a 'real' treatment effect, but the difference is marked and could accentuate a  
54 selection bias based upon which patients are offered HBOT as an adjunct. Although access to HBOT is  
55  
56  
57  
58  
59  
60

1  
2  
3  
4 limited, the early transfer of patients from a primary hospital to a larger, specialized referral centre did not  
5 seem to worsen outcome of patients with suspected or confirmed NSTI [20,41,42]. Current  
6 recommendations based largely on retrospective clinical studies and preclinical evidence recommend six to  
7 seven HBOT sessions within the first 72 hours from admission [43–45]. Our data found that a median  
8 number of 3 sessions of HBOT were given in this cohort; this could be looked upon as undertreatment.  
9 However, no randomized trials exist that can either recommend or refute the use of HBOT on NSTI patients  
10 [17].  
11  
12  
13  
14  
15  
16  
17

18 Our study has some limitations: first, we did not confirm the NSTI diagnoses retrieved from the DNPR by  
19 medical records; second, treatment modalities may vary among hospitals, potentially affecting mortality  
20 rates differently; third, in contrast to prospective observational studies, no clinical variables describing the  
21 severity of illness (e.g. Simplified Acute Physiology Score (SAPS) III etc.) were obtainable from the registries,  
22 and so there may have been a subsequent lack of important factors that could have been built into the  
23 statistical models. The strengths of the study were that all patients with a diagnosis of NSTI nationwide  
24 were included, resulting in a precise estimate of the national incidence. The diagnoses for Charlson  
25 comorbidities, as well as the codes describing the supportive modalities have shown generally high positive  
26 predictive values when obtained from the DNPR [21]. Moreover, the present study included data from a  
27 large sample size derived over approximately 14 years with a high follow-up rate.  
28  
29  
30  
31  
32  
33  
34  
35

36 In conclusion, this nationwide study showed that incidence of NSTI is increasing, although mortality rates  
37 remain high and largely unaltered. Age, female sex and increasing comorbidities were statically significant  
38 independent factors associated with increased mortality. Admission to a high-volume NSTI hospital was  
39 associated with lower mortality. In centres treating >8 patients per year, HBOT was associated with  
40 decreased odds for mortality.  
41  
42  
43  
44  
45

46 Contributions: Study planning (MH, MBM, LBM, OH), data analysis (MH, MBM), results interpretation (MH,  
47 MBM, LBM, OH), drafting manuscript (MH, OH), revision and approval of final version of manuscript (MH,  
48 MBM, LBM, OH). The corresponding author attests that all listed authors meet authorship criteria and that  
49 no others meeting the criteria have been omitted. Corresponding author serves as guarantor for the  
50 present study.  
51  
52  
53  
54  
55  
56  
57  
58  
59  
60

1  
2  
3  
4 Transparency: The lead author (MH) affirms that the manuscript is an honest, accurate, and transparent  
5 account of the study being reported; that no important aspects of the study have been omitted; and that  
6 any discrepancies from the study as originally planned have been explained.  
7  
8

9  
10  
11 Ethical approval: Not required

12 Funding source: This work was supported by “Copenhagen University Hospital (Rigshospitalet) Research  
13 Grant” (grant number R167-A7352-B3897), which included a research fellowship for MH. Moreover, the  
14 study was supported by the projects of PERMIT (grant number 8113-00009B) funded by Innovation Fund  
15 Denmark and EU Horizon 2020 and PERAID (grant number 8114-00005B) funded by Innovation Fund  
16 Denmark and Nordforsk. No funders had any role in the design, conduct, collection, analysis, and  
17 interpretation of the data. Nor in the preparation, approval or submission of the manuscript.  
18  
19  
20  
21  
22

23  
24 Data sharing: Data not available for sharing. For information on how to access to the Danish National  
25 Patient Registry, the Danish Civil Registration System and the Cause of Death Register, follow the  
26 instructions at <https://sundhedsdatastyrelsen.dk/forskerservice>  
27  
28

29  
30  
31 The Corresponding Author has the right to grant on behalf of all authors and does grant on behalf of all  
32 authors, an exclusive licence (or non exclusive for government employees) on a worldwide basis to the BMJ  
33 Publishing Group Ltd to permit this article (if accepted) to be published in BMJ editions and any other  
34 BMJ PGL products and sublicences such use and exploit all subsidiary rights, as set out in our licence.  
35  
36  
37

38  
39 All authors have completed the *Unified Competing Interest form* (available on request from the  
40 corresponding author) and declare: no support from any organisation for the submitted work; no financial  
41 relationships with any organisations that might have an interest in the submitted work in the previous  
42 three years, no other relationships or activities that could appear to have influenced the submitted work.  
43  
44  
45  
46  
47  
48  
49  
50  
51  
52  
53  
54  
55  
56  
57  
58  
59  
60

## References

- 1 Stevens DL, Bryant AE. Necrotizing Soft-Tissue Infections. *N Engl J Med* 2017;**377**:2253–65. doi:10.1056/NEJMra1600673
- 2 Madsen MB, Skrede S, Perner A, *et al.* Patient ' s characteristics and outcomes in necrotising soft - tissue infections : results from a Scandinavian , multicentre , prospective cohort study. Published Online First: 2019. doi:10.1007/s00134-019-05730-x
- 3 SUDARSKY LA, LASCHINGER JC, COPPA GF, *et al.* Improved Results from a Standardized Approach in Treating Patients with Necrotizing Fasciitis. *Ann Surg* 1987;**106**:661–5. doi:10.1097/00000658-198711000-00018
- 4 Brandt MM, Corpron CA, Wahl WL. Necrotizing soft tissue infections: a surgical disease. *Am Surg* 2000;**66**:961–7.
- 5 Elliott DC, Kufera JA, Myers RA. Necrotizing soft tissue infections. Risk factors for mortality and strategies for management. *Ann Surg* 1996;**224**:672–83. <http://ovidsp.ovid.com/ovidweb.cgi?T=JS&PAGE=reference&D=medc2&NEWS=N&AN=8916882>
- 6 Stamenkovic I, Lew PD. Early recognition of potentially fatal necrotizing fasciitis. The use of frozen-section biopsy. *N Engl J Med* 1984;**310**:1689–93. doi:10.1056/NEJM198406283102601
- 7 Boyer A, Vargas F, Coste F, *et al.* Influence of surgical treatment timing on mortality from necrotizing soft tissue infections requiring intensive care management. *Intensive Care Med* 2009;**35**:847–53. doi:10.1007/s00134-008-1373-4
- 8 Wang KC, Shih CH. Necrotizing fasciitis of the extremities. *J Trauma* 1992;**32**:179–82.
- 9 Elliott D, Kufera J MR. Necrotizing Soft Tissue Infections : Risk Factors for Mortality and Strategies for Management. *Methods* 2006;**224**:672–83.
- 10 Wong CH, Chang HC, Pasupathy S, *et al.* Necrotizing fasciitis: Clinical presentation, microbiology, and determinants of mortality. *J Bone Jt Surg - Ser A* 2003;**85**:1454–60. doi:10.2106/00004623-200308000-00005
- 11 Majeski JA, Alexander JW. Early diagnosis, nutritional support, and immediate extensive debridement improve survival in necrotizing fasciitis. *Am J Surg* 1983;**145**:784–7. doi:10.1016/0002-9610(83)90140-X

- 1  
2  
3  
4 12 Majeski J, Majeski E. Necrotizing fasciitis: Improved survival with early recognition by tissue biopsy  
5 and aggressive surgical treatment. *South Med J* 1997;**90**:1065–8. doi:10.1097/00007611-199711000-  
6 00001  
7  
8  
9  
10 13 Freischlag JA, Ajalat G, Busuttill RW. Treatment of necrotizing soft tissue infections. The need for a  
11 new approach. *Am J Surg* 1985;**149**:751–5. doi:10.1016/S0002-9610(85)80180-X  
12  
13  
14 14 Devaney P, Frawley P FL. Necrotising soft tissue infections: The effect of hyperbaric oxygen on  
15 mortality. *Anaesth Intensive Care* 2015;**43**:685–92. doi:10.1177/0310057X1504300604  
16  
17  
18 15 Shaw JJ, Psoinos C, Emhoff TA, *et al*. Not Just Full of Hot Air : Hyperbaric Oxygen Therapy Increases  
19 Survival in Cases of Necrotizing Soft Tissue Infections. 2014;**15**:328–35. doi:10.1089/sur.2012.135  
20  
21  
22 16 Soh CR, Pietrobon R, Freiburger JJ, *et al*. Hyperbaric oxygen therapy in necrotising soft tissue  
23 infections: a study of patients in the United States Nationwide Inpatient Sample. *Intensive Care Med*  
24 2012;**38**:1143–51. doi:10.1007/s00134-012-2558-4  
25  
26  
27 17 Levett D, Bennett MH, Millar I, *et al*. Adjunctive hyperbaric oxygen for necrotizing fasciitis. *Cochrane*  
28 *database Syst Rev* 2015;**1**:CD007937. doi:10.1002/14651858.CD007937.pub2  
29  
30  
31 18 Sartelli M, Guirao X, Hardcastle TC, *et al*. 2018 WSES/SIS-E consensus conference: Recommendations  
32 for the management of skin and soft-tissue infections. *World J Emerg Surg* 2018;**13**:1–24.  
33 doi:10.1186/s13017-018-0219-9  
34  
35  
36  
37 19 Stevens DL, Bisno AL, Chambers HF, *et al*. Practice guidelines for the diagnosis and management of  
38 skin and soft tissue infections: 2014 update by the infectious diseases society of America. *Clin Infect*  
39 *Dis* 2014;**59**. doi:10.1093/cid/ciu296  
40  
41  
42  
43 20 Audureau E, Hua C, de Prost N, *et al*. Mortality of necrotizing fasciitis: relative influence of individual  
44 and hospital-level factors, a nationwide multilevel study, France, 2007–12. *Br J Dermatol*  
45 2017;**177**:1575–82. doi:10.1111/bjd.15615  
46  
47  
48  
49 21 Schmidt M, Schmidt SAJ, Sandegaard JL, *et al*. The Danish National Patient Registry: a review of  
50 content, data quality, and research potential. *Clin Epidemiol* 2015;**7**:449–90.  
51 doi:10.2147/CLEP.S91125  
52  
53  
54 22 Schmidt M, Pedersen L, Sorensen HT. The Danish Civil Registration System as a tool in epidemiology.  
55 *Eur J Epidemiol* 2014;**29**:541–9. doi:10.1007/s10654-014-9930-3  
56  
57  
58 23 Helweg-Larsen K. The Danish Register of Causes of Death. *Scand J Public Health* 2011;**39**:26–9.  
59  
60



1  
2  
3  
4  
5  
6  
7  
8  
9  
10  
11  
12  
13  
14  
15  
16  
17  
18  
19  
20  
21  
22  
23  
24  
25  
26  
27  
28  
29  
30  
31  
32  
33  
34  
35  
36  
37  
38  
39  
40  
41  
42  
43  
44  
45  
46  
47  
48  
49  
50  
51  
52  
53  
54  
55  
56  
57  
58  
59  
60

doi:10.1177/1403494811399958

- 24 Charlson ME, Pompei P, Ales KL, *et al.* A new method of classifying prognostic comorbidity in longitudinal studies: development and validation. *J Chronic Dis* 1987;**40**:373–83. doi:10.1016/0021-9681(87)90171-8
- 25 Quan H, Li B, Couris CM, *et al.* Updating and validating the charlson comorbidity index and score for risk adjustment in hospital discharge abstracts using data from 6 countries. *Am J Epidemiol* 2011;**173**:676–82. doi:10.1093/aje/kwq433
- 26 Benchimol EI, Smeeth L, Guttman A, *et al.* The REporting of studies Conducted using Observational Routinely-collected health Data (RECORD) statement. *PLoS Med* 2015;**12**:e1001885. doi:10.1371/journal.pmed.1001885
- 27 Khamnuan P, Chongruksut W, Jearwattanakanok K, *et al.* Necrotizing fasciitis: Epidemiology and clinical predictors for amputation. *Int J Gen Med* 2015;**8**:195–202. doi:10.2147/IJGM.S82999
- 28 Das DK, Baker MG, Venugopal K. Increasing incidence of necrotizing fasciitis in New Zealand: a nationwide study over the period 1990 to 2006. *J Infect* 2011;**63**:429–33. doi:10.1016/j.jinf.2011.07.019
- 29 Naseer U, Steinbakk M, Blystad H, *et al.* Epidemiology of invasive group A streptococcal infections in Norway 2010–2014: A retrospective cohort study. *Eur J Clin Microbiol Infect Dis* 2016;**35**:1639–48. doi:10.1007/s10096-016-2704-y
- 30 Dixon B. Fasciitis continues to surprise. *Lancet Infect Dis* 2008;**8**:279. doi:10.1016/S1473-3099(08)70081-1
- 31 Soltani AM, Best MJ, Francis CS, *et al.* Trends in the incidence and treatment of necrotizing soft tissue infections: An analysis of the national hospital discharge survey. *J Burn Care Res* 2014;**35**:449–54. doi:10.1097/BCR.000000000000010
- 32 Lauridsen MD, Gammelager H, Schmidt M, *et al.* Positive predictive value of International Classification of Diseases, 10th revision, diagnosis codes for cardiogenic, hypovolemic, and septic shock in the Danish National Patient Registry. *BMC Med Res Methodol* 2015;**15**:23. doi:10.1186/s12874-015-0013-2
- 33 Stevenson EK, Rubenstein AR, Radin GT, *et al.* Two decades of mortality trends among patients with severe sepsis: A comparative meta-Analysis. *Crit Care Med* 2014;**42**:625–31.

1  
2  
3  
4 doi:10.1097/CCM.0000000000000026  
5

- 6  
7 34 Rudd KE, Johnson SC, Agesa KM, *et al.* Global, regional, and national sepsis incidence and mortality,  
8 1990 – 2017: analysis for the Global Burden of Disease study. *Lancet* 2020;**6736**:1–12.  
9 doi:10.1016/S0140-6736(19)32989-7  
10  
11  
12 35 Sperling C, Noer MC, Christensen IJ, *et al.* Comorbidity is an independent prognostic factor for the  
13 survival of ovarian cancer: A Danish register-based cohort study from a clinical database. *Gynecol*  
14 *Oncol* 2013;**129**:97–102. doi:10.1016/j.ygyno.2012.12.039  
15  
16  
17  
18 36 Raedkjaer M, Maretty-Kongstad K, Baad-Hansen T, *et al.* The impact of comorbidity on mortality in  
19 danish sarcoma patients from 2000-2013: A nationwide population-based multicentre study. *PLoS*  
20 *One* 2018;**13**:1–13. doi:10.1371/journal.pone.0198933  
21  
22  
23  
24 37 Cronin-Fenton DP, Nørgaard M, Jacobsen J, *et al.* Comorbidity and survival of Danish breast cancer  
25 patients from 1995 to 2005. *Br J Cancer* 2007;**96**:1462–8. doi:10.1038/sj.bjc.6603717  
26  
27  
28 38 Stavem K, Hoel H, Skjaker SA, *et al.* Charlson comorbidity index derived from chart review or  
29 administrative data: Agreement and prediction of mortality in intensive care patients. *Clin Epidemiol*  
30 2017;**9**:311–20. doi:10.2147/CLEP.S133624  
31  
32  
33  
34 39 Quan H, Sundararajan V, Halfon P, *et al.* Coding algorithms for defining comorbidities in ICD-9-CM  
35 and ICD-10 administrative data. *Med Care* 2005;**43**:1130–9.  
36 doi:10.1097/01.mlr.0000182534.19832.83  
37  
38  
39 40 Thygesen SK, Christiansen CF, Christensen S, *et al.* The predictive value of ICD-10 diagnostic coding  
40 used to assess Charlson comorbidity index conditions in the population-based Danish National  
41 Registry of Patients. *BMC Med Res Methodol* 2011;**11**:83. doi:10.1186/1471-2288-11-83  
42  
43  
44 41 Ingraham AM, Jung HS, Liepert AE, *et al.* Effect of transfer status on outcomes for necrotizing soft  
45 tissue infections. *J Surg Res* 2017;**220**:372–8. doi:10.1016/j.jss.2017.06.006  
46  
47  
48 42 Proud D, Bruscano Raiola F, Holden D, *et al.* Are we getting necrotizing soft tissue infections right? A  
49 10-year review. *ANZ J Surg* 2014;**84**:468–72. doi:10.1111/ans.12412  
50  
51  
52 43 Mathieu D, Marroni A, Kot J. Tenth European Consensus Conference on Hyperbaric Medicine:  
53 recommendations for accepted and non-accepted clinical indications and practice of hyperbaric  
54 oxygen treatment. *Diving Hyperb Med* 2017;**47**:24–32. doi:10.28920/dhm47.1.24-32  
55  
56  
57 44 Bakker D. Clostridial Myonecrosis (gas gangrene). In: Weaver LK, ed. *Hyperbaric oxygen therapy*  
58  
59  
60

1  
2  
3  
4 *Indications*. Best Publishing Company 2014. 114–25.  
5

6 45 Jacoby I. Necrotizing soft tissue infections. In: Weaver LK, ed. *Hyperbar Oxygen Therapy Indications*.  
7  
8 United States: : Best Publishing Company 2014. 169–77.  
9

10  
11  
12  
13  
14  
15  
16  
17  
18  
19  
20  
21  
22  
23  
24  
25  
26  
27  
28  
29  
30  
31  
32  
33  
34  
35  
36  
37  
38  
39  
40  
41  
42  
43  
44  
45  
46  
47  
48  
49  
50  
51  
52  
53  
54  
55  
56  
57  
58  
59  
60

For peer review only

Table 1

| Demographics       |                                             |            |
|--------------------|---------------------------------------------|------------|
| Patients (n=1527)  |                                             |            |
|                    | Age (years)                                 | 62 [50–72] |
|                    | Sex, male                                   | 966 (63%)  |
| Comorbidities      |                                             |            |
|                    | Myocardial infarction                       | 118 (8%)   |
|                    | Congestive heart failure                    | 227 (15%)  |
|                    | Peripheral vascular disease                 | 238 (16%)  |
|                    | Cerebrovascular disease                     | 235 (15%)  |
|                    | Dementia                                    | 53 (4%)    |
|                    | Chronic pulmonary disease                   | 283 (19%)  |
|                    | Rheumatologic disease                       | 87 (6%)    |
|                    | Peptic ulcer disease                        | 116 (8%)   |
|                    | Mild liver disease                          | 126 (8%)   |
|                    | Moderate or severe liver disease            | 63 (4%)    |
|                    | Diabetes without chronic complications      | 431 (28%)  |
|                    | Diabetes with chronic complications         | 228 (15%)  |
|                    | Hemiplegia or paraplegia                    | 40 (3%)    |
|                    | Renal disease                               | 201 (13%)  |
|                    | Cancer (any malignancy)                     | 330 (22%)  |
|                    | Metastatic solid tumor                      | 80 (5%)    |
|                    | HIV/AIDS                                    | 11 (1%)    |
|                    | Charlson score                              | 1 [0-2]    |
|                    | Charlson Comorbidity index                  |            |
|                    | 0                                           | 398 (26%)  |
|                    | 1-2                                         | 759 (50%)  |
|                    | 3-4                                         | 286 (19%)  |
|                    | ≥ 5                                         | 84 (6%)    |
|                    | Weighted Charlson score                     | 2 [0-4]    |
|                    | Weighted Charlson Comorbidity index         |            |
|                    | 0                                           | 398 (26%)  |
|                    | 1-2                                         | 506 (33%)  |
|                    | 3-4                                         | 330 (22%)  |
|                    | ≥ 5                                         | 293 (19%)  |
| Hospital category* |                                             |            |
|                    | Low volume (< 8 NSTI/year)                  | 419 (27%)  |
|                    | High volume (≥ 8 NSTI/year)                 | 1108 (73%) |
| Period (year)      |                                             |            |
|                    | 2005–2011                                   | 694 (45%)  |
|                    | 2012–2018                                   | 833 (55%)  |
| Other              |                                             |            |
|                    | Septic shock                                | 472 (31%)  |
|                    | Surgery <4 weeks prior to diagnosis of NSTI | 260 (17%)  |

Table 1. Data are presented as n (%) or median [IQR]. Comorbidity diagnoses from 10 years prior until NSTI diagnosis. Each comorbidity was defined as by the Charlson conditions (ICD-10 diagnoses in Appendix). Septic shock was defined as the ICD-10 diagnosis “Septic shock” or “Sepsis” and a concurrent diagnosis of inotropes (Diagnoses and supportive modalities in Appendix). IQR, interquartile range; NSTI, necrotizing soft tissue infection. \*Defined as the lowest number of NSTI cases annually treated at one of the three main teaching hospitals in Denmark.

**Table 2**

| <b>Interventions</b>                              |  |               |
|---------------------------------------------------|--|---------------|
| Surgery                                           |  |               |
| Amputations                                       |  | 111 (7.7%)    |
| Supportive modalities                             |  |               |
| Admission to intensive care unit                  |  | 1506 (99%)    |
| Mechanical ventilation                            |  | 1317 (86%)    |
| Use of vasopressor/inotrope                       |  | 1095 (72%)    |
| Renal-replacement therapy, at least one treatment |  | 268 (18%)     |
| HBOT, at any time                                 |  | 554 (36%)     |
| Hours from diagnosis to first HBOT                |  | 4.2 [2.1–6.2] |
| Number of HBOT                                    |  | 3 [2–3]       |
| ≥2 HBOT within 24 hours                           |  | 252 (45%)     |

Table 2. Procedures/interventions within 7 days from NSTI diagnosis. Data are presented as n (%) or median [IQR]. IQR, interquartile range; HBOT, Hyperbaric Oxygen Therapy; NSTI, necrotizing soft tissue infection.

Table 3:

| All-cause mortality across severity of comorbidity |                          |                          |                          |
|----------------------------------------------------|--------------------------|--------------------------|--------------------------|
| Weighted Charlson Index                            | 30-day mortality         | 90-day mortality         | 1-year mortality*        |
| 0                                                  | 11.4% (95%CI: 8.5-15.0)  | 13.7% (95%CI: 11.6-18.9) | 15.4% (95%CI: 11.8-19.5) |
| 1-2                                                | 20.6% (95%CI: 17.1-24.4) | 26.3% (95%CI: 22.5-30.4) | 31.6% (95%CI: 27.4-36.1) |
| 3-4                                                | 25.8% (95%CI: 21.1-30.8) | 30.6% (95%CI: 25.7-35.9) | 37.3% (95%CI: 31.9-42.9) |
| ≥ 5                                                | 20.9% (95%CI: 16.4-26.0) | 32.9% (95%CI: 27.5-38.6) | 40.4% (95%CI: 34.6-46.4) |

\*Patients enrolled 2005–2017 (n=1429). CI, Confidence Interval.

Table 4:

| Factors associated with 90-day mortality |                   |         |                      |         |  |
|------------------------------------------|-------------------|---------|----------------------|---------|--|
|                                          | Crude OR (95% CI) | P-value | Adjusted OR (95% CI) | P-value |  |
| Patients (n=1527)                        |                   |         |                      |         |  |
| Age (years)                              | 1.06 (1.05–1.08)  | <0.001  | 1.06 (1.05–1.07)     | <0.001  |  |
| Sex (male)                               | 0.69 (0.55–0.88)  | 0.002   | 0.72 (0.56–0.94)     | 0.01    |  |
| Weighted Charlson Comorbidity Index      |                   |         |                      |         |  |
| 0                                        | 1 (Ref.)          |         | 1 (Ref.)             |         |  |
| 1–2                                      | 2.27 (1.61–3.24)  | <0.001  | 1.50 (1.03–2.21)     | 0.04    |  |
| 3–4                                      | 2.81 (1.95–4.09)  | <0.001  | 1.64 (1.09–2.48)     | 0.02    |  |
| ≥ 5                                      | 3.10 (2.14–4.55)  | <0.001  | 1.96 (1.31–2.96)     | 0.001   |  |
| Hospital category*                       |                   |         |                      |         |  |
| < 8 NSTI/year                            | 1 (Ref.)          |         | 1 (Ref.)             |         |  |
| ≥ 8 NSTI/year                            | 0.48 (0.38–0.61)  | <0.001  | 0.59 (0.45–0.77)     | <0.001  |  |
| Period (year)                            |                   |         |                      |         |  |
| 2005–2011                                | 1 (Ref.)          |         | 1 (Ref.)             |         |  |
| 2012–2018                                | 1.10 (0.87–1.38)  | 0.44    | 0.98 (0.76–1.27)     | 0.89    |  |
| HBOT treated individuals (n=554)         |                   |         |                      |         |  |
| Number of HBOT, total                    |                   |         |                      |         |  |
| 1                                        | 1 (Ref.)          |         | 1 (Ref.)             |         |  |
| 2                                        | 0.72 (0.37–1.41)  | 0.34    | 0.83 (0.38–1.80)     | 0.64    |  |
| 3                                        | 0.49 (0.25–0.94)  | 0.03    | 0.49 (0.22–1.05)     | 0.07    |  |
| Sessions within 24 hours                 |                   |         |                      |         |  |
| ≥ 2 HBOT                                 | 1 (Ref.)          |         | 1 (Ref.)             |         |  |
| <2 HBOT                                  | 1.45 (0.89–2.41)  | 0.14    | 1.37 (0.73–2.59)     | 0.34    |  |

Factors associated with 90-day mortality. Adjusted for age, sex and weighted Charlson Comorbidity Index. OR, Odds ratio; CI, Confidence Interval; HBOT, Hyperbaric Oxygen Therapy; NSTI, Necrotizing soft tissue infection. \*Defined as the lowest number of NSTI cases annually treated at one of the three main teaching hospitals in Denmark.

1  
2  
3  
4  
5  
6  
7  
8  
9  
10  
11  
12  
13  
14  
15  
16  
17  
18  
19  
20  
21  
22  
23  
24  
25  
26  
27  
28  
29  
30  
31  
32  
33  
34  
35  
36  
37  
38  
39  
40  
41  
42  
43  
44  
45  
46  
47  
48  
49  
50  
51  
52  
53  
54  
55  
56  
57  
58  
59  
60

Fig 1

Yearly incidences of necrotizing soft tissue infection in Denmark

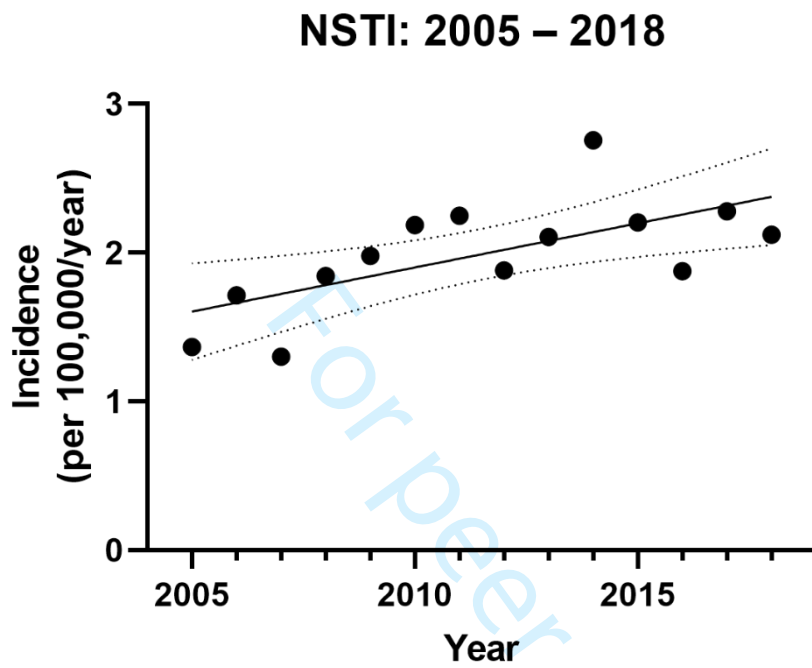

Fig 1. The solid line describes the trend by regression analysis; the dotted lines represent the 95% confidence intervals. NSTI; necrotizing soft tissue infection.

Fig 2 – Survival curve for patients with necrotizing soft tissue infection.

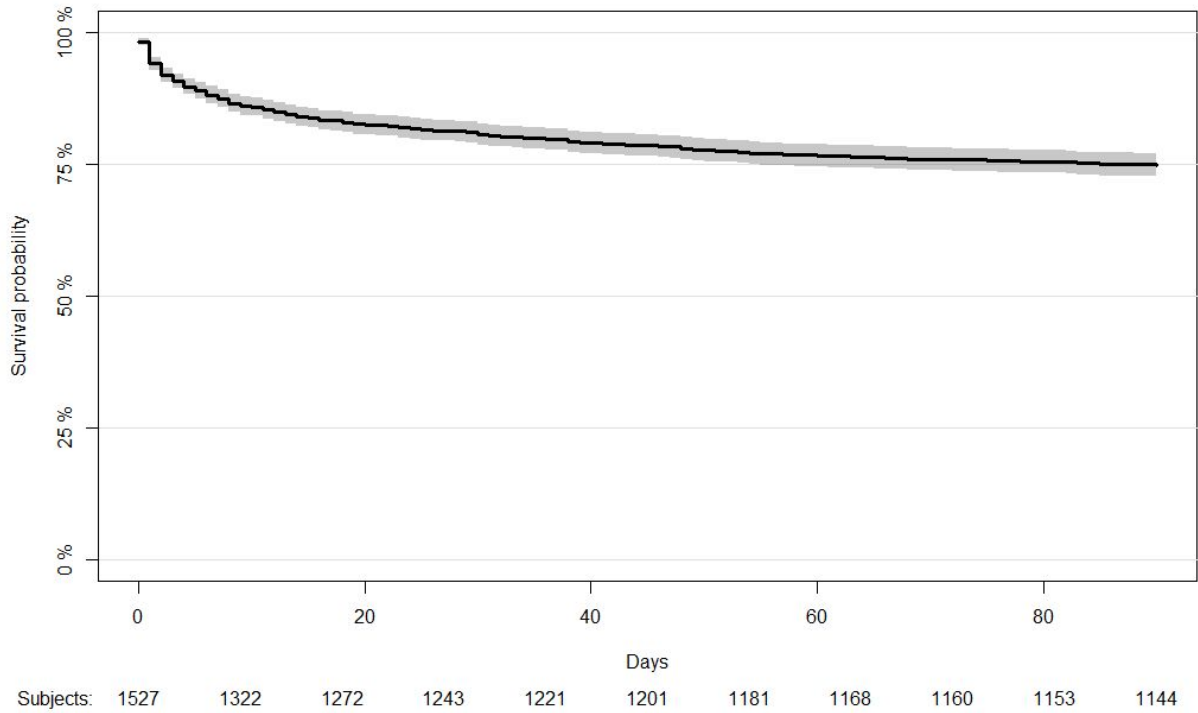

Fig 2. The solid line represents the survival curve. The grey area represents the 95% confidence interval. The survival curve was censored at day 90.



1  
2  
3  
4  
5  
6  
7  
8  
9  
10  
11  
12  
13  
14  
15  
16  
17  
18  
19  
20  
21  
22  
23  
24  
25  
26  
27  
28  
29  
30  
31  
32  
33  
34  
35  
36  
37  
38  
39  
40  
41  
42  
43  
44  
45  
46  
47  
48  
49  
50  
51  
52  
53  
54  
55  
56  
57  
58  
59  
60

Box 1. BMJ requirement:

What is already known on this topic

- Cohort studies of patients with NSTI have highlighted the severity of disease
- Findings on the association between patient-related risk factors and mortality are inconsistent.
- A description of incidence, comorbidities, treatment modalities and mortality are missing in the nationwide cohort of patients with NSTI.

What this study adds

- Our study shows that the nationwide incidence of NSTI has increased while mortality rates remain high.
- Higher age, female sex and increasing number of comorbidities were independent risk factors for 90-day mortality, while treatment at high-volume hospitals decreased the risk of death.
- In contrast to other countries, hyperbaric oxygen therapy is a frequently used treatment modality for NSTI in Denmark.

**The RECORD statement – checklist of items, extended from the STROBE statement, that should be reported in observational studies using routinely collected health data.**

|                           | Item No. | STROBE items                                                                                                                                                                               | Location in manuscript where items are reported | RECORD items                                                                                                                                                                                                                                                                                                                                                                                                                                | Location in manuscript where items are reported                      |
|---------------------------|----------|--------------------------------------------------------------------------------------------------------------------------------------------------------------------------------------------|-------------------------------------------------|---------------------------------------------------------------------------------------------------------------------------------------------------------------------------------------------------------------------------------------------------------------------------------------------------------------------------------------------------------------------------------------------------------------------------------------------|----------------------------------------------------------------------|
| <b>Title and abstract</b> |          |                                                                                                                                                                                            |                                                 |                                                                                                                                                                                                                                                                                                                                                                                                                                             |                                                                      |
|                           | 1        | (a) Indicate the study's design with a commonly used term in the title or the abstract (b) Provide in the abstract an informative and balanced summary of what was done and what was found |                                                 | RECORD 1.1: The type of data used should be specified in the title or abstract. When possible, the name of the databases used should be included.<br><br>RECORD 1.2: If applicable, the geographic region and timeframe within which the study took place should be reported in the title or abstract.<br><br>RECORD 1.3: If linkage between databases was conducted for the study, this should be clearly stated in the title or abstract. | Title, abstract and material and methods (1 <sup>st</sup> paragraph) |
| <b>Introduction</b>       |          |                                                                                                                                                                                            |                                                 |                                                                                                                                                                                                                                                                                                                                                                                                                                             |                                                                      |
| Background rationale      | 2        | Explain the scientific background and rationale for the investigation being reported                                                                                                       |                                                 |                                                                                                                                                                                                                                                                                                                                                                                                                                             | Introduction, paragraph 1-3                                          |
| Objectives                | 3        | State specific objectives, including any prespecified hypotheses                                                                                                                           |                                                 |                                                                                                                                                                                                                                                                                                                                                                                                                                             | Introduction paragraph 4                                             |
| <b>Methods</b>            |          |                                                                                                                                                                                            |                                                 |                                                                                                                                                                                                                                                                                                                                                                                                                                             |                                                                      |
| Study Design              | 4        | Present key elements of study design early in the paper                                                                                                                                    |                                                 |                                                                                                                                                                                                                                                                                                                                                                                                                                             | Title, abstract, Material and Methods 1 <sup>st</sup> paragraph      |
| Setting                   | 5        | Describe the setting, locations, and relevant dates, including                                                                                                                             |                                                 |                                                                                                                                                                                                                                                                                                                                                                                                                                             | Material and Methods 1 <sup>st</sup> paragraph                       |

|   |                              |                                                                  |                                                                                                                                                                                                                                                                                                                                                                                                                                                                                                                                                                                                                                                                                                                              |                                                                                                                                                                                                                                                                                                                                                                                                                                                                                                                                                                                                                                                                                                      |                                                                                                                                                                                                                                                |
|---|------------------------------|------------------------------------------------------------------|------------------------------------------------------------------------------------------------------------------------------------------------------------------------------------------------------------------------------------------------------------------------------------------------------------------------------------------------------------------------------------------------------------------------------------------------------------------------------------------------------------------------------------------------------------------------------------------------------------------------------------------------------------------------------------------------------------------------------|------------------------------------------------------------------------------------------------------------------------------------------------------------------------------------------------------------------------------------------------------------------------------------------------------------------------------------------------------------------------------------------------------------------------------------------------------------------------------------------------------------------------------------------------------------------------------------------------------------------------------------------------------------------------------------------------------|------------------------------------------------------------------------------------------------------------------------------------------------------------------------------------------------------------------------------------------------|
| 1 |                              | periods of recruitment, exposure, follow-up, and data collection |                                                                                                                                                                                                                                                                                                                                                                                                                                                                                                                                                                                                                                                                                                                              |                                                                                                                                                                                                                                                                                                                                                                                                                                                                                                                                                                                                                                                                                                      |                                                                                                                                                                                                                                                |
| 2 | Participants                 | 6                                                                | <p>(a) <i>Cohort study</i> - Give the eligibility criteria, and the sources and methods of selection of participants. Describe methods of follow-up</p> <p><i>Case-control study</i> - Give the eligibility criteria, and the sources and methods of case ascertainment and control selection. Give the rationale for the choice of cases and controls</p> <p><i>Cross-sectional study</i> - Give the eligibility criteria, and the sources and methods of selection of participants</p> <p>(b) <i>Cohort study</i> - For matched studies, give matching criteria and number of exposed and unexposed</p> <p><i>Case-control study</i> - For matched studies, give matching criteria and the number of controls per case</p> | <p>RECORD 6.1: The methods of study population selection (such as codes or algorithms used to identify subjects) should be listed in detail. If this is not possible, an explanation should be provided.</p> <p>RECORD 6.2: Any validation studies of the codes or algorithms used to select the population should be referenced. If validation was conducted for this study and not published elsewhere, detailed methods and results should be provided.</p> <p>RECORD 6.3: If the study involved linkage of databases, consider use of a flow diagram or other graphical display to demonstrate the data linkage process, including the number of individuals with linked data at each stage.</p> | <p>Material and Methods 2<sup>nd</sup> paragraph (Data collection) includes ICD-10 codes for population selection.</p> <p>Linkage between registries described 1<sup>st</sup> paragraph of Material and Methods. No flow diagram attached.</p> |
| 3 | Variables                    | 7                                                                | Clearly define all outcomes, exposures, predictors, potential confounders, and effect modifiers. Give diagnostic criteria, if applicable.                                                                                                                                                                                                                                                                                                                                                                                                                                                                                                                                                                                    | RECORD 7.1: A complete list of codes and algorithms used to classify exposures, outcomes, confounders, and effect modifiers should be provided. If these cannot be reported, an explanation should be provided.                                                                                                                                                                                                                                                                                                                                                                                                                                                                                      | All variables (ICD-10 codes or SKS-codes) listed in Supplemental Appendix A.                                                                                                                                                                   |
| 4 | Data sources/<br>measurement | 8                                                                | For each variable of interest, give sources of data and details of methods of assessment (measurement).                                                                                                                                                                                                                                                                                                                                                                                                                                                                                                                                                                                                                      |                                                                                                                                                                                                                                                                                                                                                                                                                                                                                                                                                                                                                                                                                                      | Material and Methods, paragraph 2+3                                                                                                                                                                                                            |

|                        |    |                                                                                                                                                                                                                                                                                                                                                               |  |                                                                                                                                                                                    |
|------------------------|----|---------------------------------------------------------------------------------------------------------------------------------------------------------------------------------------------------------------------------------------------------------------------------------------------------------------------------------------------------------------|--|------------------------------------------------------------------------------------------------------------------------------------------------------------------------------------|
|                        |    | Describe comparability of assessment methods if there is more than one group                                                                                                                                                                                                                                                                                  |  |                                                                                                                                                                                    |
| Bias                   | 9  | Describe any efforts to address potential sources of bias                                                                                                                                                                                                                                                                                                     |  | Material and Methods (last paragraph including statistical analysis). Moreover, potential biases which were not included are addressed in “limitations” section of the discussion. |
| Study size             | 10 | Explain how the study size was arrived at                                                                                                                                                                                                                                                                                                                     |  | -                                                                                                                                                                                  |
| Quantitative variables | 11 | Explain how quantitative variables were handled in the analyses. If applicable, describe which groupings were chosen, and why                                                                                                                                                                                                                                 |  | Material and Methods (statistical analysis)                                                                                                                                        |
| Statistical methods    | 12 | (a) Describe all statistical methods, including those used to control for confounding<br>(b) Describe any methods used to examine subgroups and interactions<br>(c) Explain how missing data were addressed<br>(d) <i>Cohort study</i> - If applicable, explain how loss to follow-up was addressed<br><i>Case-control study</i> - If applicable, explain how |  | Material and Methods (statistical analysis)                                                                                                                                        |

|    |                                  |                                                                                                               |                                                                                                                                                                                                                                                                                                                        |                                                                                                                                                                                                                                                                                                                    |                                                                                                          |
|----|----------------------------------|---------------------------------------------------------------------------------------------------------------|------------------------------------------------------------------------------------------------------------------------------------------------------------------------------------------------------------------------------------------------------------------------------------------------------------------------|--------------------------------------------------------------------------------------------------------------------------------------------------------------------------------------------------------------------------------------------------------------------------------------------------------------------|----------------------------------------------------------------------------------------------------------|
| 1  |                                  | matching of cases and controls was addressed                                                                  |                                                                                                                                                                                                                                                                                                                        |                                                                                                                                                                                                                                                                                                                    |                                                                                                          |
| 2  |                                  | <i>Cross-sectional study</i> - If applicable, describe analytical methods taking account of sampling strategy |                                                                                                                                                                                                                                                                                                                        |                                                                                                                                                                                                                                                                                                                    |                                                                                                          |
| 3  |                                  | (e) Describe any sensitivity analyses                                                                         |                                                                                                                                                                                                                                                                                                                        |                                                                                                                                                                                                                                                                                                                    |                                                                                                          |
| 4  |                                  |                                                                                                               |                                                                                                                                                                                                                                                                                                                        |                                                                                                                                                                                                                                                                                                                    |                                                                                                          |
| 5  |                                  |                                                                                                               |                                                                                                                                                                                                                                                                                                                        |                                                                                                                                                                                                                                                                                                                    |                                                                                                          |
| 6  |                                  |                                                                                                               |                                                                                                                                                                                                                                                                                                                        |                                                                                                                                                                                                                                                                                                                    |                                                                                                          |
| 7  |                                  |                                                                                                               |                                                                                                                                                                                                                                                                                                                        |                                                                                                                                                                                                                                                                                                                    |                                                                                                          |
| 8  |                                  |                                                                                                               |                                                                                                                                                                                                                                                                                                                        |                                                                                                                                                                                                                                                                                                                    |                                                                                                          |
| 9  |                                  |                                                                                                               |                                                                                                                                                                                                                                                                                                                        |                                                                                                                                                                                                                                                                                                                    |                                                                                                          |
| 10 | Data access and cleaning methods | ..                                                                                                            |                                                                                                                                                                                                                                                                                                                        | RECORD 12.1: Authors should describe the extent to which the investigators had access to the database population used to create the study population.<br><br>RECORD 12.2: Authors should provide information on the data cleaning methods used in the study.                                                       | Material and Methods + information on how to retrieve data from DNPR included in “Data Sharing” section. |
| 11 |                                  |                                                                                                               |                                                                                                                                                                                                                                                                                                                        |                                                                                                                                                                                                                                                                                                                    |                                                                                                          |
| 12 |                                  |                                                                                                               |                                                                                                                                                                                                                                                                                                                        |                                                                                                                                                                                                                                                                                                                    |                                                                                                          |
| 13 |                                  |                                                                                                               |                                                                                                                                                                                                                                                                                                                        |                                                                                                                                                                                                                                                                                                                    |                                                                                                          |
| 14 |                                  |                                                                                                               |                                                                                                                                                                                                                                                                                                                        |                                                                                                                                                                                                                                                                                                                    |                                                                                                          |
| 15 |                                  |                                                                                                               |                                                                                                                                                                                                                                                                                                                        |                                                                                                                                                                                                                                                                                                                    |                                                                                                          |
| 16 |                                  |                                                                                                               |                                                                                                                                                                                                                                                                                                                        |                                                                                                                                                                                                                                                                                                                    |                                                                                                          |
| 17 |                                  |                                                                                                               |                                                                                                                                                                                                                                                                                                                        |                                                                                                                                                                                                                                                                                                                    |                                                                                                          |
| 18 |                                  |                                                                                                               |                                                                                                                                                                                                                                                                                                                        |                                                                                                                                                                                                                                                                                                                    |                                                                                                          |
| 19 |                                  |                                                                                                               |                                                                                                                                                                                                                                                                                                                        |                                                                                                                                                                                                                                                                                                                    |                                                                                                          |
| 20 | Linkage                          | ..                                                                                                            |                                                                                                                                                                                                                                                                                                                        | RECORD 12.3: State whether the study included person-level, institutional-level, or other data linkage across two or more databases. The methods of linkage and methods of linkage quality evaluation should be provided.                                                                                          | Material and Methods 1 <sup>st</sup> paragraph (Person-level)                                            |
| 21 |                                  |                                                                                                               |                                                                                                                                                                                                                                                                                                                        |                                                                                                                                                                                                                                                                                                                    |                                                                                                          |
| 22 |                                  |                                                                                                               |                                                                                                                                                                                                                                                                                                                        |                                                                                                                                                                                                                                                                                                                    |                                                                                                          |
| 23 |                                  |                                                                                                               |                                                                                                                                                                                                                                                                                                                        |                                                                                                                                                                                                                                                                                                                    |                                                                                                          |
| 24 |                                  |                                                                                                               |                                                                                                                                                                                                                                                                                                                        |                                                                                                                                                                                                                                                                                                                    |                                                                                                          |
| 25 |                                  |                                                                                                               |                                                                                                                                                                                                                                                                                                                        |                                                                                                                                                                                                                                                                                                                    |                                                                                                          |
| 26 |                                  |                                                                                                               |                                                                                                                                                                                                                                                                                                                        |                                                                                                                                                                                                                                                                                                                    |                                                                                                          |
| 27 |                                  |                                                                                                               |                                                                                                                                                                                                                                                                                                                        |                                                                                                                                                                                                                                                                                                                    |                                                                                                          |
| 28 | <b>Results</b>                   |                                                                                                               |                                                                                                                                                                                                                                                                                                                        |                                                                                                                                                                                                                                                                                                                    |                                                                                                          |
| 29 | Participants                     | 13                                                                                                            | (a) Report the numbers of individuals at each stage of the study ( <i>e.g.</i> , numbers potentially eligible, examined for eligibility, confirmed eligible, included in the study, completing follow-up, and analysed)<br>(b) Give reasons for non-participation at each stage.<br>(c) Consider use of a flow diagram | RECORD 13.1: Describe in detail the selection of the persons included in the study ( <i>i.e.</i> , study population selection) including filtering based on data quality, data availability and linkage. The selection of included persons can be described in the text and/or by means of the study flow diagram. | Material and Methods (Data Collection).                                                                  |
| 30 |                                  |                                                                                                               |                                                                                                                                                                                                                                                                                                                        |                                                                                                                                                                                                                                                                                                                    |                                                                                                          |
| 31 |                                  |                                                                                                               |                                                                                                                                                                                                                                                                                                                        |                                                                                                                                                                                                                                                                                                                    |                                                                                                          |
| 32 |                                  |                                                                                                               |                                                                                                                                                                                                                                                                                                                        |                                                                                                                                                                                                                                                                                                                    |                                                                                                          |
| 33 |                                  |                                                                                                               |                                                                                                                                                                                                                                                                                                                        |                                                                                                                                                                                                                                                                                                                    |                                                                                                          |
| 34 |                                  |                                                                                                               |                                                                                                                                                                                                                                                                                                                        |                                                                                                                                                                                                                                                                                                                    |                                                                                                          |
| 35 |                                  |                                                                                                               |                                                                                                                                                                                                                                                                                                                        |                                                                                                                                                                                                                                                                                                                    |                                                                                                          |
| 36 |                                  |                                                                                                               |                                                                                                                                                                                                                                                                                                                        |                                                                                                                                                                                                                                                                                                                    |                                                                                                          |
| 37 |                                  |                                                                                                               |                                                                                                                                                                                                                                                                                                                        |                                                                                                                                                                                                                                                                                                                    |                                                                                                          |
| 38 |                                  |                                                                                                               |                                                                                                                                                                                                                                                                                                                        |                                                                                                                                                                                                                                                                                                                    |                                                                                                          |
| 39 |                                  |                                                                                                               |                                                                                                                                                                                                                                                                                                                        |                                                                                                                                                                                                                                                                                                                    |                                                                                                          |
| 40 |                                  |                                                                                                               |                                                                                                                                                                                                                                                                                                                        |                                                                                                                                                                                                                                                                                                                    |                                                                                                          |
| 41 |                                  |                                                                                                               |                                                                                                                                                                                                                                                                                                                        |                                                                                                                                                                                                                                                                                                                    |                                                                                                          |
| 42 |                                  |                                                                                                               |                                                                                                                                                                                                                                                                                                                        |                                                                                                                                                                                                                                                                                                                    |                                                                                                          |
| 43 |                                  |                                                                                                               |                                                                                                                                                                                                                                                                                                                        |                                                                                                                                                                                                                                                                                                                    |                                                                                                          |
| 44 |                                  |                                                                                                               |                                                                                                                                                                                                                                                                                                                        |                                                                                                                                                                                                                                                                                                                    |                                                                                                          |
| 45 |                                  |                                                                                                               |                                                                                                                                                                                                                                                                                                                        |                                                                                                                                                                                                                                                                                                                    |                                                                                                          |
| 46 |                                  |                                                                                                               |                                                                                                                                                                                                                                                                                                                        |                                                                                                                                                                                                                                                                                                                    |                                                                                                          |
| 47 |                                  |                                                                                                               |                                                                                                                                                                                                                                                                                                                        |                                                                                                                                                                                                                                                                                                                    |                                                                                                          |

|                                                                                                    |                  |    |                                                                                                                                                                                                                                                                                                                                                                                                                          |  |                                                                          |
|----------------------------------------------------------------------------------------------------|------------------|----|--------------------------------------------------------------------------------------------------------------------------------------------------------------------------------------------------------------------------------------------------------------------------------------------------------------------------------------------------------------------------------------------------------------------------|--|--------------------------------------------------------------------------|
| 1<br>2<br>3<br>4<br>5<br>6<br>7<br>8<br>9<br>10<br>11<br>12                                        | Descriptive data | 14 | (a) Give characteristics of study participants ( <i>e.g.</i> , demographic, clinical, social) and information on exposures and potential confounders<br>(b) Indicate the number of participants with missing data for each variable of interest<br>(c) <i>Cohort study</i> - summarise follow-up time ( <i>e.g.</i> , average and total amount)                                                                          |  | Results 1 <sup>st</sup> paragraph + Table 1                              |
| 13<br>14<br>15<br>16<br>17<br>18<br>19<br>20<br>21<br>22<br>23                                     | Outcome data     | 15 | <i>Cohort study</i> - Report numbers of outcome events or summary measures over time<br><i>Case-control study</i> - Report numbers in each exposure category, or summary measures of exposure<br><i>Cross-sectional study</i> - Report numbers of outcome events or summary measures                                                                                                                                     |  | Results section, Table 1+2                                               |
| 24<br>25<br>26<br>27<br>28<br>29<br>30<br>31<br>32<br>33<br>34<br>35<br>36<br>37<br>38<br>39<br>40 | Main results     | 16 | (a) Give unadjusted estimates and, if applicable, confounder-adjusted estimates and their precision ( <i>e.g.</i> , 95% confidence interval). Make clear which confounders were adjusted for and why they were included<br>(b) Report category boundaries when continuous variables were categorized<br>(c) If relevant, consider translating estimates of relative risk into absolute risk for a meaningful time period |  | Results + subsection "Mortality" including adjusted estimates + Table 4. |
| 41<br>42<br>43                                                                                     | Other analyses   | 17 | Report other analyses done— <i>e.g.</i> , analyses of subgroups and                                                                                                                                                                                                                                                                                                                                                      |  | -                                                                        |

44  
45  
46  
47

|                                                           |    |                                                                                                                                                                            |  |                                                                                                                                                                                                                                                                                                          |                                                                                                      |
|-----------------------------------------------------------|----|----------------------------------------------------------------------------------------------------------------------------------------------------------------------------|--|----------------------------------------------------------------------------------------------------------------------------------------------------------------------------------------------------------------------------------------------------------------------------------------------------------|------------------------------------------------------------------------------------------------------|
|                                                           |    | interactions, and sensitivity analyses                                                                                                                                     |  |                                                                                                                                                                                                                                                                                                          |                                                                                                      |
| <b>Discussion</b>                                         |    |                                                                                                                                                                            |  |                                                                                                                                                                                                                                                                                                          |                                                                                                      |
| Key results                                               | 18 | Summarise key results with reference to study objectives                                                                                                                   |  |                                                                                                                                                                                                                                                                                                          | Discussion 1 <sup>st</sup> + 2 <sup>nd</sup> paragraph.                                              |
| Limitations                                               | 19 | Discuss limitations of the study, taking into account sources of potential bias or imprecision. Discuss both direction and magnitude of any potential bias                 |  | RECORD 19.1: Discuss the implications of using data that were not created or collected to answer the specific research question(s). Include discussion of misclassification bias, unmeasured confounding, missing data, and changing eligibility over time, as they pertain to the study being reported. | Discussion paragraph 8 “limitations”                                                                 |
| Interpretation                                            | 20 | Give a cautious overall interpretation of results considering objectives, limitations, multiplicity of analyses, results from similar studies, and other relevant evidence |  |                                                                                                                                                                                                                                                                                                          | Discussion, entire section.                                                                          |
| Generalisability                                          | 21 | Discuss the generalisability (external validity) of the study results                                                                                                      |  |                                                                                                                                                                                                                                                                                                          | Discussion paragraph 8.                                                                              |
| <b>Other Information</b>                                  |    |                                                                                                                                                                            |  |                                                                                                                                                                                                                                                                                                          |                                                                                                      |
| Funding                                                   | 22 | Give the source of funding and the role of the funders for the present study and, if applicable, for the original study on which the present article is based              |  |                                                                                                                                                                                                                                                                                                          | Subsection “Funding Sources”                                                                         |
| Accessibility of protocol, raw data, and programming code |    | ..                                                                                                                                                                         |  | RECORD 22.1: Authors should provide information on how to access any supplemental information such as the study protocol, raw data, or programming code.                                                                                                                                                 | Supplemental information (including ICD-10 + SKS-codes in Supplemental Appendix). How to access DNPR |

|  |  |  |  |  |                    |
|--|--|--|--|--|--------------------|
|  |  |  |  |  | in “Data Sharing”. |
|--|--|--|--|--|--------------------|

1  
2  
3  
4 \*Reference: Benchimol EI, Smeeth L, Guttman A, Harron K, Moher D, Petersen I, Sørensen HT, von Elm E, Langan SM, the RECORD Working  
5 Committee. The REporting of studies Conducted using Observational Routinely-collected health Data (RECORD) Statement. *PLoS Medicine* 2015;  
6 in press.  
7

8 \*Checklist is protected under Creative Commons Attribution ([CC BY](https://creativecommons.org/licenses/by/4.0/)) license.  
9  
10  
11  
12  
13  
14  
15  
16  
17  
18  
19  
20  
21  
22  
23  
24  
25  
26  
27  
28  
29  
30  
31  
32  
33  
34  
35  
36  
37  
38  
39  
40  
41  
42  
43  
44  
45  
46  
47

For peer review only



1  
2  
3  
4  
5  
6  
7  
8  
9  
10  
11  
12  
13  
14  
15  
16  
17  
18  
19  
20  
21  
22  
23  
24  
25  
26  
27  
28  
29  
30  
31  
32  
33  
34  
35  
36  
37  
38  
39  
40  
41  
42  
43  
44  
45  
46  
47  
48  
49  
50  
51  
52  
53  
54  
55  
56  
57  
58  
59  
60

**Appendix 2: ICD-10 codes for Charlson Comorbidity Index**

|           |                                  |
|-----------|----------------------------------|
| I21       | <b>Myocardial infarction</b>     |
| I22       |                                  |
| I252      |                                  |
| I099      | <b>Congestive heart failure</b>  |
| I110      |                                  |
| I130      |                                  |
| I132      |                                  |
| I255      |                                  |
| I420      |                                  |
| I425–I429 |                                  |
| I43       |                                  |
| I50       |                                  |
| P290      |                                  |
| I70       |                                  |
| I71       |                                  |
| I731      |                                  |
| I738      |                                  |
| I739      |                                  |
| I771      |                                  |
| I790      |                                  |
| I792      |                                  |
| K551      |                                  |
| K558      |                                  |
| K559      |                                  |
| Z958      |                                  |
| Z959      |                                  |
| G45       | <b>Cerebrovascular disease</b>   |
| G46       |                                  |
| I60–I69   |                                  |
| H340      |                                  |
| F00–F03   | <b>Dementia</b>                  |
| G30       |                                  |
| F051      |                                  |
| G311      |                                  |
| I278      | <b>Chronic pulmonary disease</b> |
| I279      |                                  |

|    |         |                                       |
|----|---------|---------------------------------------|
| 1  |         |                                       |
| 2  |         |                                       |
| 3  |         |                                       |
| 4  | J40-J47 |                                       |
| 5  | J60-J67 |                                       |
| 6  | J684    |                                       |
| 7  | J701    |                                       |
| 8  | J703    |                                       |
| 9  |         |                                       |
| 10 |         |                                       |
| 11 | M05     | <b>Rheumatologic disease</b>          |
| 12 | M06     |                                       |
| 13 | M315    |                                       |
| 14 | M32-M34 |                                       |
| 15 | M351    |                                       |
| 16 | M353    |                                       |
| 17 | M360    |                                       |
| 18 |         |                                       |
| 19 | K25-K28 | <b>Peptic ulcer</b>                   |
| 20 |         |                                       |
| 21 | G041    | <b>Hemiplegia/ paraplegia</b>         |
| 22 | G114    |                                       |
| 23 | G801    |                                       |
| 24 | G802    |                                       |
| 25 | G81     |                                       |
| 26 | G82     |                                       |
| 27 | G830    |                                       |
| 28 | G831    |                                       |
| 29 | G832    |                                       |
| 30 | G833    |                                       |
| 31 | G834    |                                       |
| 32 | G839    |                                       |
| 33 |         |                                       |
| 34 | E100    | <b>Diabetes without complications</b> |
| 35 | E101    |                                       |
| 36 | E106    |                                       |
| 37 | E108    |                                       |
| 38 | E109    |                                       |
| 39 | E110    |                                       |
| 40 | E111    |                                       |
| 41 | E116    |                                       |
| 42 | E118    |                                       |
| 43 | E119    |                                       |
| 44 | E120    |                                       |
| 45 | E121    |                                       |
| 46 |         |                                       |
| 47 |         |                                       |
| 48 |         |                                       |
| 49 |         |                                       |
| 50 |         |                                       |
| 51 |         |                                       |
| 52 |         |                                       |
| 53 |         |                                       |
| 54 |         |                                       |
| 55 |         |                                       |
| 56 |         |                                       |
| 57 |         |                                       |
| 58 |         |                                       |
| 59 |         |                                       |
| 60 |         |                                       |

1  
2  
3  
4  
5  
6  
7  
8  
9  
10  
11  
12  
13  
14  
15  
16  
17  
18  
19  
20  
21  
22  
23  
24  
25  
26  
27  
28  
29  
30  
31  
32  
33  
34  
35  
36  
37  
38  
39  
40  
41  
42  
43  
44  
45  
46  
47  
48  
49  
50  
51  
52  
53  
54  
55  
56  
57  
58  
59  
60

|            |                                            |
|------------|--------------------------------------------|
| E126       |                                            |
| E128       |                                            |
| E129       |                                            |
| E130       |                                            |
| E131       |                                            |
| E136       |                                            |
| E138       |                                            |
| E139       |                                            |
| E140       |                                            |
| E141       |                                            |
| E146       |                                            |
| E148       |                                            |
| E149       |                                            |
| E102-DE105 |                                            |
| E107       |                                            |
| E112       |                                            |
| E115       |                                            |
| E117       |                                            |
| E122-E125  | <b>Diabetes with chronic complications</b> |
| E127       |                                            |
| E132-E135  |                                            |
| E137       |                                            |
| E142-E145  |                                            |
| E147       |                                            |
| B18        |                                            |
| K700-K703  |                                            |
| K709       |                                            |
| K713-K715  |                                            |
| K717       |                                            |
| K73        | <b>Mild liver disease</b>                  |
| K74        |                                            |
| K760       |                                            |
| K762-K764  |                                            |
| K768       |                                            |
| K769       |                                            |
| Z944       |                                            |
| I850       | <b>Moderate/severe liver disease</b>       |

|           |                               |
|-----------|-------------------------------|
| I859      |                               |
| I864      |                               |
| I982      |                               |
| K704      |                               |
| K711      |                               |
| K721      |                               |
| K729      |                               |
| K765-K767 |                               |
| I120      | <b>Renal disease</b>          |
| I131      |                               |
| N032-N037 |                               |
| N052-N057 |                               |
| N18       |                               |
| N19       |                               |
| N250      |                               |
| Z490-Z492 |                               |
| Z940      |                               |
| Z992      |                               |
| C00-C26   |                               |
| C30-C34   |                               |
| C37-C41   |                               |
| C43       |                               |
| C45-C58   |                               |
| C60-C76   |                               |
| C81-C85   |                               |
| C88       |                               |
| C90-C97   |                               |
| C77-C80   | <b>Metastatic solid tumor</b> |
| B20-B22   | <b>HIV/AIDS</b>               |
| B24       |                               |

**Appendix 3: SKS-codes for different diagnoses**

Hyperbaric oxygen therapy:

BGXA6\*

Mechanical ventilation:

BGDA0-7

Renal-replacement therapy:

BJFD0, BJFD00, BJFD01, BJFD02

Vasopressor/inotrope:

BFHC93\* (excl. BFHC93E-H)

BFHC92\*

BFHC95

Intensive care unit admission:

NABB, NABE

Septic shock:

R572

A41.9A (+BFHC92, BFHC93 excl. BFHC93E-H, BFHC95)

Amputations:

Upper arm: KNBQ0, KNBQ01, KNBQ02, KNBQ03, KNBQ99

Lower arm: KNCQ19, KNCQ99, KNDQ1, KNDQ14, KNDQ16, KNDQ17, KNDQ24, KNDQ26, KNDQ27

Hand: KNDQ99

Pelvis: KNEQ99

Upper leg: KNFQ19, KNFQ29B, KNFQ99

Lower leg: KNGQ19, KNGQ99

Foot: KNHQ1, KNHQ11, KNHQ14, KNHQ17, KNHQ99

Penis: KKG00-KKGC10

# BMJ Open

## Incidence, comorbidity and mortality in patients with necrotizing soft tissue infections, 2005–2018: A Danish nationwide register-based cohort study

|                                 |                                                                                                                                                                                                                                                                                                                                        |
|---------------------------------|----------------------------------------------------------------------------------------------------------------------------------------------------------------------------------------------------------------------------------------------------------------------------------------------------------------------------------------|
| Journal:                        | <i>BMJ Open</i>                                                                                                                                                                                                                                                                                                                        |
| Manuscript ID                   | bmjopen-2020-041302.R1                                                                                                                                                                                                                                                                                                                 |
| Article Type:                   | Original research                                                                                                                                                                                                                                                                                                                      |
| Date Submitted by the Author:   | 11-Aug-2020                                                                                                                                                                                                                                                                                                                            |
| Complete List of Authors:       | Hedetoft, Morten; Copenhagen University Hospital, Dept. of Anaesthesia<br>Madsen, Martin; Copenhagen University Hospital, Department of Intensive Care, 4131, Rigshospitalet<br>Madsen, Lærke; Copenhagen University Hospital, Department of Anaesthesia<br>Hyldegaard, Ole; Copenhagen University Hospital, Department of Anaesthesia |
| <b>Primary Subject Heading</b>: | Intensive care                                                                                                                                                                                                                                                                                                                         |
| Secondary Subject Heading:      | Anaesthesia, Infectious diseases, Surgery                                                                                                                                                                                                                                                                                              |
| Keywords:                       | EPIDEMIOLOGY, INFECTIOUS DISEASES, Adult intensive & critical care < INTENSIVE & CRITICAL CARE, Adult surgery < SURGERY                                                                                                                                                                                                                |
|                                 |                                                                                                                                                                                                                                                                                                                                        |

SCHOLARONE™  
Manuscripts



I, the Submitting Author has the right to grant and does grant on behalf of all authors of the Work (as defined in the below author licence), an exclusive licence and/or a non-exclusive licence for contributions from authors who are: i) UK Crown employees; ii) where BMJ has agreed a CC-BY licence shall apply, and/or iii) in accordance with the terms applicable for US Federal Government officers or employees acting as part of their official duties; on a worldwide, perpetual, irrevocable, royalty-free basis to BMJ Publishing Group Ltd ("BMJ") its licensees and where the relevant Journal is co-owned by BMJ to the co-owners of the Journal, to publish the Work in this journal and any other BMJ products and to exploit all rights, as set out in our [licence](#).

The Submitting Author accepts and understands that any supply made under these terms is made by BMJ to the Submitting Author unless you are acting as an employee on behalf of your employer or a postgraduate student of an affiliated institution which is paying any applicable article publishing charge ("APC") for Open Access articles. Where the Submitting Author wishes to make the Work available on an Open Access basis (and intends to pay the relevant APC), the terms of reuse of such Open Access shall be governed by a Creative Commons licence – details of these licences and which [Creative Commons](#) licence will apply to this Work are set out in our licence referred to above.

Other than as permitted in any relevant BMJ Author's Self Archiving Policies, I confirm this Work has not been accepted for publication elsewhere, is not being considered for publication elsewhere and does not duplicate material already published. I confirm all authors consent to publication of this Work and authorise the granting of this licence.

# Incidence, comorbidity and mortality in patients with necrotizing soft tissue infections, 2005–2018: A Danish nationwide register-based cohort study

Morten Hedetoft<sup>1\*</sup>, Martin Bruun Madsen<sup>2</sup>, Lærke Bruun Madsen<sup>1</sup>, Ole Hyldegaard<sup>1</sup>

<sup>1</sup>Department of Anaesthesia, Centre of Head and Orthopaedics, Copenhagen University Hospital, Rigshospitalet, Copenhagen, Denmark

<sup>2</sup>Department of Intensive Care, Copenhagen University Hospital, Rigshospitalet, Copenhagen, Denmark.

\*Corresponding author's e-mail: morten.friis.fiskbaek.hedetoft@regionh.dk

## Abstract

*Objective:* To assess the incidence, comorbidities, treatment modalities and mortality in patients with necrotizing soft tissue infections (NSTIs) in Denmark.

*Design:* Nationwide population-based registry study.

*Setting:* Denmark.

*Participants:* Danish residents with NSTI between 1 January 2005 and 31 August 2018.

*Main outcome measure:* Incidence of disease per 100,000 person/year and all-cause mortality at day 90 obtained from Danish National Patient Registry and the Danish Civil Registration System.

*Results:* 1,527 patients with NSTI were identified, yielding an incidence of 1.99 per 100,000 person/year. All-cause 30-day, 90-day and 1-year mortality were 19.4% (95% CI: 17.4 to 21.5), 25.2% (95% CI: 23.1 to 27.5) and 30.4% (95% CI: 28.0 to 32.8), respectively. Amputation occurred in 7% of the individuals. Diabetes was the most predominant comorbidity affecting 43% of the cohort, while 26% had no comorbidities. Higher age, female sex and increasing comorbidity index were found to be independent risk factors of mortality. Admission to high-volume hospitals was associated with improved survival (OR 0.59, 95% CI 0.45 to 0.77). Thirty-six percent received hyperbaric oxygen therapy (HBOT) as an adjunctive therapy. No change in overall mortality was found over the studied time period.

*Conclusion:* The present study found that in Denmark, the incidence of NSTI increased; mortality rates remained high and largely unaltered. Diabetes was the most common comorbidity, while higher age, female sex and increasing comorbidity index were associated to increased mortality. Survival was improved in those admitted to hospitals with more expertise in treating NSTI. In high-volume hospital, HBOT was associated with decreased odds for mortality.



1  
2  
3  
4  
5  
6  
7  
8  
9  
10  
11  
12  
13  
14  
15  
16  
17  
18  
19  
20  
21  
22  
23  
24  
25  
26  
27  
28  
29  
30  
31  
32  
33  
34  
35  
36  
37  
38  
39  
40  
41  
42  
43  
44  
45  
46  
47  
48  
49  
50  
51  
52  
53  
54  
55  
56  
57  
58  
59  
60

*Keywords: Necrotizing Soft Tissue Infection; Incidence; Comorbidity; Survival*

### **Strengths and limitations of this study**

- All data linked on an individual level across registries with a substantial high follow-up rate.
- Nationwide cohort resulting in a precise estimate of national incidence, demographics and outcomes in contrast to observational studies.
- Inclusion of more than 1,500 patients with NSTI across a 14-year time period: a relatively large sample size considering the rarity of disease.
- No clinical variables describing the severity of illness were obtainable from the registries, and so there may have been a subsequent lack of important factors that could have been built into the statistical models.

## Introduction

Necrotizing soft tissue infection (NSTI) is a severe disease associated with substantial morbidity and mortality. NSTI is characterized by rapidly-progressing soft tissue inflammation and necrosis [1]. The infection can be either mono- or polymicrobial, caused by numerous organisms but most commonly by group A streptococcus [2]. Immediate, aggressive, and radical surgical debridement is key in the management of NSTI. Despite rigorous treatment, patients with NSTI have high mortality rates, risk of amputation, and often have prolonged hospital and rehabilitation stays. Mortality rates can be markedly different (6–41%) [3–7], but a recent, large prospective multicenter study demonstrated a 90-day mortality of 18%, which included the use of adjuvant therapies such as intravenous immunoglobulin (IVIG) and hyperbaric oxygen therapy (HBOT) [2]. Retrospective studies and pathophysiological reasoning have indicated that a delay to the first surgical debridement is associated with increased mortality [8–11]. Surgery should be accompanied by broad-spectrum antibiotics and supportive intensive care, which taken together remain the standard of care in the treatment of NSTI.

HBOT has been advocated as adjunctive therapy to the multidisciplinary course of treatment for NSTI and has in retrospective studies been shown to reduce mortality, particularly in the most critically ill patients [12–14]. As with most other treatment interventions in these patients, no randomized clinical trials investigating the effects of HBOT in these patients have been made [15]. Only 1% of patients with NSTI in the United States received HBOT at specialized centres [14] and although the use of HBOT is not universally accepted as a routine clinical treatment for this disease [16,17], most retrospective clinical studies and larger database studies combined with a large body of preclinical data, may justify its current use as adjuvant therapy to surgery, antibiotic therapy and intensive care support [2-5]. In Denmark, three HBOT-centres exist; of which two centres offer HBOT using monochambers but only one ICU-capable multi compartment chamber offers adjunctive routine HBOT treatment for NSTI.

In Denmark, few major teaching hospitals receive patients with NSTI from other hospitals for multidisciplinary care. Of these, one receives patients from all parts of the country for centralized treatment using a multidisciplinary protocol, including HBOT [2]. This should be of benefit, as an increased rate of survival has been shown in patients with NSTI who are treated in high-volume NSTI centers where expertise can be developed [18]. However, as many patients with NSTI have septic shock and multiple organ failure, the delayed time taken for transportation to a centralized treatment hospital by air or road ambulance can pose a risk to life and therefore, is not always feasible.

1  
2  
3  
4 The epidemiology of NSTI in Denmark has never been fully described, and its nationwide incidence and  
5 mortality is unknown. Furthermore, it is not known how many patients are transferred after initial  
6 treatment to a centralized hospital for a multidisciplinary approach, or how many receive HBOT; only one  
7 center offers HBOT to critically ill patients on a routine basis. The aim of this study was to evaluate NSTI  
8 incidence and mortality in Denmark with special attention to patients receiving centralized,  
9 multidisciplinary treatment, including adjuvant HBOT.  
10  
11  
12  
13  
14  
15

## 16 **Material and Methods**

### 17 *Setting.*

18  
19 This was a nationwide population-based registry study of patients diagnosed with NSTI between 1 January  
20 2005 and 31 August 2018 in Denmark. Data were obtained from the Danish National Patient Registry  
21 (DNPR) [19], the Danish Civil Registration System (CRS) [20] and the Cause of Death Register (CDR) [21]. By  
22 law, public hospitals in Denmark are required to prospectively report data to these registries. All data were  
23 linked to each separate individual using a unique 10-digit number assigned to every Danish resident living in  
24 Denmark and non-Danish citizens patients treated in Denmark.  
25  
26  
27  
28  
29  
30

### 31 *Data collection.*

32  
33 All NSTI cases in Denmark were identified from the DNPR using International Classification of Diseases-10  
34 (ICD10) codes; M726 (necrotizing fasciitis), M725A (necrotizing fasciitis, before 2012), N498C (Fournier's  
35 gangrene) and A480 (gas gangrene). DNPR includes information on hospital contacts, procedures,  
36 diagnostic codes, admission, and discharge dates on an individual level. To classify comorbidities, diagnoses  
37 were obtained from the DNPR, using the Charlson Comorbidity Index, a well-established classification  
38 including more than 17 medical conditions [22]. A weighted Charlson Comorbidity Index was also used, as it  
39 has shown good discrimination when predicting in-hospital mortality [23]. We included comorbidity  
40 diagnoses from 10 years prior to the NSTI diagnosis.  
41  
42  
43  
44  
45  
46  
47

48 Data obtained from the CRS included information on sex, date of birth, vital status, date of death or  
49 emigration from Denmark. The CDR was used to gain information on cause of death on an individual level.  
50 In order to define a 'high-volume NSTI hospital', we identified the lowest number of NSTI patients treated  
51 yearly at one of the three major teaching hospitals in Denmark. In assessing procedures related to the NSTI  
52 diagnosis, we chose to include only data on surgical interventions, supportive modalities and procedures  
53 made within seven days of NSTI diagnosis.  
54  
55  
56  
57  
58  
59  
60

1  
2  
3  
4 The present study was approved by The Danish Data Protection Agency (P-2019-153) and the Danish Health  
5 Data Authority (FSEID-0004419). According to Danish law, the use of observational data from approved  
6 registries does not require ethical approval or informed consent. The study was written in compliance with  
7 the Reporting of Studies Conducted using Observational Routinely-collected health Data (RECORD)  
8 statement [24] (Supplementary appendix 1). The ICD-10 codes used for extraction of comorbidities are  
9 found in the Supplementary appendix 2, and the Health Authorities Classification System (SKS)-codes used  
10 for extraction of procedures (surgery and medical procedures/treatments) in Supplementary appendix 3.  
11  
12  
13  
14  
15  
16

17  
18 For those readers with a special interest, the quality of the DNPR and introduction to the Danish SKS-  
19 classification system has been reviewed by Schmidt M et al. [19].  
20  
21

### 22 *Patient and Public Involvement*

23 No patients were involved in the design, implementation, or dissemination of the results from the present  
24 study.  
25  
26  
27

### 28 *Statistical analysis.*

29 We expressed category characteristics and outcomes as absolute numbers (%) and continuous data was  
30 reported as medians (interquartile range [IQR]). Annual incidence was expressed as cases per 100,000  
31 persons per year. Mortality rates were presented as percentages with 95% confidence intervals (CI).  
32 Comparisons were performed using Wilcoxon Rank Sum Test for quantitative data and Fisher's exact test  
33 for categorical data.  
34  
35  
36  
37  
38  
39  
40

41 Unadjusted and adjusted multivariable logistic regression models were built to identify risk factors  
42 associated with increased mortality. All models included age, sex, and weighted Charlson Comorbidity  
43 Index as covariates. Additionally, 'hospital category' and 'number of HBOTs' were included as covariates  
44 after showing significant association with survival in univariate analyses. P-values were reported as exact  
45 values unless they were <0.001. P-values <0.05 were considered statistically significant. Patients who were  
46 lost to follow-up were excluded from the analyses. Statistical analyses were performed with RStudio  
47 version 1.0.153 (RStudio, Inc.) and GraphPad Prism version 8.0.2 (GraphPad Inc., La Jolla, Ca, USA).  
48  
49  
50  
51  
52  
53

### 54 **Results**

55 A total of 1,527 patients with NSTI were identified between 1 of January 2005 and 31 of August 2018,  
56 yielding a nationwide NSTI incidence of 1.99 per 100,000 person/year (95%CI: 1.79 to 2.19). Over the  
57  
58  
59  
60

1  
2  
3  
4 period of the study, a trend to an increased number of annual NSTI cases (0.06 per 100.000 person/year,  
5 95%CI: 0.02 to 0.10) was noted (fig 1).  
6  
7  
8

9 Patient median age was 62 (IQR: 50–72), of which 63% were male. Of the 1,527 patients included, 1,303  
10 (85%) were registered with the diagnosis of necrotizing fasciitis, 155 (10%) with Fournier’s gangrene and  
11 362 (24%) with gas gangrene. Two hundred and forty-four (16%) patients were registered with more than  
12 one of the diagnoses. A total of 260 (17%) had surgery within 4 weeks before the NSTI diagnosis.  
13  
14 Characteristics including comorbidities, hospital category and supportive modalities are presented in Table  
15 1. During the first 90 days after NSTI diagnosis, the median number of days alive and out of hospital were  
16 55 (IQR: 10–76).  
17  
18  
19  
20  
21  
22

### 23 *Interventions and Supportive Modalities*

24 The majority (1506/1527; 99%) of patients were admitted to an intensive care unit, with 86% being  
25 mechanically ventilated and 72% treated with vasopressor/inotrope (Table 2). Two hundred and sixty-eight  
26 patients (18%) were treated with renal-replacement therapy (at least one treatment with either  
27 hemodialysis or continuous renal-replacement therapy) and 554 (36%) patients were treated with HBOT.  
28 These patients received their first HBOT after a median of 4.2 (IQR 2.1–6.2) hours from diagnosis at the  
29 admitting hospital. They received a median of three HBOT sessions (IQR 2–3), and 45% received two or  
30 more HBOT sessions within 24 hours after arrival. The remaining 974 (64%) patients did not receive HBOT  
31 as a treatment modality for their NSTI. Among those patients who were referred to a HBOT-capable  
32 hospital, the annual percentage of HBOT-treated patients varied from 56–82% (lowest 2006, highest  
33 2015).  
34  
35  
36  
37  
38  
39  
40  
41  
42

43 A total of 111 (7%) patients underwent at least one type of amputation within 7 days of NSTI diagnosis.  
44 Amputation of the upper leg was the most common, and was seen in 73 (5%) patients, followed by  
45 amputation of the lower leg (n=18, 1%), upper arm (n=11, <1%), penis (n=6, <1%), lower arm (n=3, <1%),  
46 foot (n=3, <1%) and hand (n=1, <1%). Four patients underwent more than one type of amputation.  
47  
48  
49  
50

### 51 *Mortality*

52 Six patients were lost to follow-up at Day 90, resulting in a 99.6% follow-up rate. These patients were  
53 excluded from the survival analyses. In total, 295 patients died within 30 days of diagnosis (19.4%, 95% CI:  
54 17.4 to 21.5) and 384 within 90 days (25.2%, 95% CI: 23.1 to 27.5) (fig 2). As patients who entered the study  
55 in 2018 have not been studied for a full year when the study was ended, these patients were excluded from  
56  
57  
58  
59  
60

1  
2  
3  
4 assessment of 1-year mortality. Of the 1,429 individuals enrolled from 2005 to 2017, 1-year mortality was  
5 30.4% (95% CI: 28.0 to 32.8). Patients who did not survive until Day 30 died after a median of 4 days [IQR:  
6 1-11]. Patients with no previous comorbidities had a 30-day, 90-day and 1-year mortality rate of 11.4%  
7 (95% CI 8.5 to 15.0), 13.7% (95% CI 10.5 to 17.5) and 15.4% (95% CI 11.8 to 19.5), respectively. Mortality  
8 rates by comorbidity groups are presented in Table 3.  
9  
10  
11  
12

13  
14 Multivariable logistic regression models showed that factors associated with an increased 90-day mortality  
15 were increasing age, female sex, increased weighted Charlson index and treatment exclusively at low-  
16 volume NSTI hospitals (Table 4). Receiving two or more HBOT sessions within 24 hours from diagnosis was  
17 not significant in either unadjusted or adjusted analyses. In unadjusted analysis, patients receiving three  
18 HBOT sessions had a significantly decreased risk of death ( $p=0.03$ ) compared to other HBOT-treated  
19 patients. However, this was not significant after adjustment for age, sex, and comorbidities ( $p=0.07$ ). No  
20 improved overall survival was found from 2012–2018 compared to 2005–2011 (Table 4).  
21  
22  
23  
24  
25  
26

27  
28 Three high-volume NSTI hospitals (>8 NSTI cases/annually) were identified. Patients treated at one high-  
29 volume NSTI hospital offering HBOT as an adjunct ( $n=859$ , including 554 HBOT-treated), had significant  
30 decreased risk of death compared to patients treated at one high-volume, non-HBOT hospital ( $n=125$ ) with  
31 Odds Ratios (OR) for 30-day mortality and 90-day mortality of 0.54 (95%CI 0.33 to 0.91,  $p=0.02$ ) and of 0.61  
32 (95%CI 0.39 to 0.97,  $p=0.03$ ), respectively. No differences were found in age, sex, or weighted comorbidity  
33 index between these high-volume hospitals ( $p=0.18$ ,  $p=0.77$  and  $p=0.06$ , respectively). The 30-day non-  
34 survivors died after a median of 4 and 5 days in these two hospital categories.  
35  
36  
37  
38  
39  
40

41  
42 HBOT-treated NSTI patients had a 30-day mortality of 7.4% (95%CI 5.4 to 9.9) and a 90-day mortality of  
43 13.9 (95%CI 11.1 to 17.1). "Necrotizing fasciitis" (M726/725) was the single most reported cause of death at  
44 Day 90 ( $n=84$ ) followed by "Other fibroblastic disorders" (M728) ( $n=16$ ) and "Sepsis, unspecified organism"  
45 (A419) ( $n=13$ ).  
46  
47  
48

## 49 **Discussion**

50  
51 The Danish registries that were used in the present study are unique, in that they can link clinical  
52 information to an individual level. Using data drawn from these databases, we studied patients with NSTI in  
53 Denmark between 1 January 2005 and 31 August 2018 (Box 1). We found a mean incidence of NSTI of 1.99  
54 per 100,000 inhabitants/year; In a study from Northern Thailand, incidence rates as high as 15.5 per  
55  
56  
57  
58  
59  
60

1  
2  
3  
4 100,000 inhabitants/year have been observed [25], but the present results are similar to those of New  
5 Zealand (1.69 per 100,000 inhabitants/year) [26] and Western Norway (3.0 per 100,000) [27].  
6  
7  
8

9 During the observation period of approximately 14 years, the incidence of NSTI appeared to increase.  
10 Numerous factors may have influenced this finding, including increased awareness of NSTI [28] and  
11 changes in the practice of registering diagnoses. However, the trend could represent a true increase in  
12 disease incidence, similar to that observed in the United States and New Zealand [26,29]. We found an all-  
13 cause 30-day, 90-day and 1-year mortality rate of 19%, 25% and 30%, respectively. In other retrospective  
14 studies, mortality varies considerably, with values as high as 41% [7]. The 30-day rate found in the present  
15 study is similar to the 28-day mortality rate of 18% reported in a recent French registry study [18] but is  
16 substantially higher than an overall mortality of 5–10% reported in a registry study including more than  
17 45,913 NSTI patients [14]. NSTI is rare and no diagnostic criteria exist; in general, the diagnosis is made by  
18 the surgeon during surgery. Computed Tomography has demonstrated a sensitivity of 89% and specificity  
19 of 93% in diagnostic accuracy[30] and may as well be required in visualization of portal of entry and  
20 extension of infection [31,32]. The Laboratory Risk Indicator for Necrotizing Fasciitis (LRINEC) has  
21 demonstrated varying performances across clinical studies suggesting that the LRINEC should not be used  
22 to rule-out NSTI[33,34,30,35]. Different classifications are based on location, eponyms, and etiology. The  
23 noticeable difference in mortality among studies could reflect the heterogeneity of NSTI patients, but also  
24 the complexity of diagnosing NSTI. In our study, 16% of patients had more than one of three codes  
25 registered, confirming this complexity. Factors independently associated with higher mortality at Day 90  
26 were older age, female sex, increasing weighted Charlson Index and treatment exclusively at low-volume  
27 NSTI hospitals. Increasing age has been reported as a risk factor of death in numerous of studies, but  
28 conflicting evidence exists as to whether female sex is an independent risk factor or not [2,18].  
29  
30  
31  
32  
33  
34  
35  
36  
37  
38  
39  
40  
41  
42  
43

44 Approximately 30% of patients in the present cohort had septic shock; this value is lower than reported  
45 recently in a prospective observational study including Scandinavian high-volume hospitals, where 50% had  
46 septic shock [2]. Data from the DNPR has shown positive predictive values of 69–82% for septic shock  
47 diagnoses, which might explain this difference [36]. However, it is possible that as the hospitals in the  
48 Scandinavian study were high-volume and took in a disproportionately large number of severe cases  
49 (including septic shock for example), the findings are not directly comparable; the present cohort included  
50 all cases, including patients that were not transferred to specialized centres, and thereby represents the  
51 overall nationwide incidence. Additional selection bias for severe cases might also be imposed by transport  
52 time, as the most severe cases may not be transferred to specialized centres possibly due to transportation  
53  
54  
55  
56  
57  
58  
59  
60

1  
2  
3  
4 constituting a risk in itself. Despite declining mortality rates among patients with sepsis in general [37,38],  
5 NSTI still remains a substantial risk of death. In accordance with existing literature [18] we did not find any  
6 significant improvement in NSTI survival over the years studied.  
7  
8  
9

10  
11 Admission to hospitals managing  $\geq 8$  NSTI cases annually in this cohort was associated with lower mortality.  
12 Admission to hospitals ( $\geq 3$  NSTI patients per year) was also associated with lower mortality in France [18].  
13 These findings might reflect a greater level of expertise in high-volume hospitals, which are also often able  
14 to offer immediate access to operating theaters and intensive care units with experienced professionals,  
15 including microbiologists, infectious disease specialists and dermatologists, at all hours. In deriving our  
16 definition of a high-volume NSTI hospital in Denmark, we used a cut-off value that represented the lowest  
17 number of NSTI cases treated at one of the three major teaching hospitals in Denmark. These hospitals are  
18 the most highly-specialized in the country, with optimal clinical care including a multidisciplinary approach  
19 in the treatment of NSTI [16].  
20  
21  
22  
23  
24  
25  
26

27  
28 Although diabetes may remain a significant burden of disease, it has not been associated with higher  
29 mortality rates in NSTI [2]. Diabetes was the most common comorbidity, affecting 43% of patients, followed  
30 by 22% with cancer and 19% with chronic pulmonary disease. This varied considerably in comparison to a  
31 large French registry study where 29% of patients had diabetes and 9% had cancer [18]. The values from  
32 our study are not extraordinarily high, however, the proportion of patients with diabetes affected by NSTI  
33 has been reported in previous studies to be as high as 71% [8]. We used the Charlson Comorbidity Index  
34 [22] to address burden of diseases, as it is one of the most frequently used comorbidity indexes, especially  
35 in survival analysis of cancer [39–41]. However, the index also predicts 30-day and 1-year mortality in  
36 intensive care patients, which the results from the present cohort is consistent with [42]. For ease of  
37 comparison between studies, we reported the Quan's weighted Charlson comorbidity score, as it is  
38 increasingly reported as the only comorbidity variable [23,43].  
39  
40  
41  
42  
43  
44  
45  
46

47  
48 A 98% positive predictive value has been shown for the Charlson's conditions obtained from the DNPR [44].  
49 Surprisingly, 26% of the patients (n=398) did not have any comorbidities at time of NSTI diagnosis.  
50 Validation of the Charlson Comorbidity Index showed an in-hospital mortality of 0.4-2.6% in patients with a  
51 comorbidity score of zero. This contrasts with an 11% 30-day mortality among patients with no  
52 comorbidities in the present cohort and highlights the severity of the NSTI even for those without pre-  
53 existing disease. Recent surgical interventions do pose a risk factor of developing NSTI [1] and nearly one  
54 fifth (17%) of the cohort had had surgery within four weeks before NSTI was diagnosed.  
55  
56  
57  
58  
59  
60



1  
2  
3  
4  
5  
6  
7  
8  
9  
10  
11  
12  
13  
14  
15  
16  
17  
18  
19  
20  
21  
22  
23  
24  
25  
26  
27  
28  
29  
30  
31  
32  
33  
34  
35  
36  
37  
38  
39  
40  
41  
42  
43  
44  
45  
46  
47  
48  
49  
50  
51  
52  
53  
54  
55  
56  
57  
58  
59  
60

An improved 30 and 90-day survival in hospitals offering HBOT as an adjunct to the multidisciplinary treatment was noted. However, these results should be interpreted cautiously due to missing confounders, such as clinical variables and potentially different treatment modalities across hospitals. Mortality among HBOT-treated individuals was noticeably reduced compared to those who did not receive HBOT. This could indicate that HBOT provides a 'real' treatment effect, but the difference is marked and could accentuate a selection bias based upon which patients are offered HBOT as an adjunct. Fifty-six to eighty-two percentage of the patients who were admitted to a HBOT capable hospital received HBOT. Presumably, some may have been in such critical hemodynamic condition where in-hospital transportation to HBOT were deemed unachievable, thereby indicating that the HBOT-treated patients represent a selected cohort. Although access to HBOT is limited, the early transfer of patients from a primary hospital to a larger, specialized referral centre did not seem to worsen outcome of patients with suspected or confirmed NSTI [18,45,46]. Current recommendations based largely on retrospective clinical studies and preclinical evidence recommend six to seven HBOT sessions within the first 72 hours from admission [47–49]. Our data found that a median number of 3 sessions of HBOT were given in this cohort; this could be looked upon as undertreatment. However, no randomized trials exist that can either recommend or refute the use of HBOT on NSTI patients [15].

Our study has some limitations: first, we did not confirm the NSTI diagnoses retrieved from the DNPR by medical records; second, treatment modalities may vary among hospitals, potentially affecting mortality rates differently; third, in contrast to prospective observational studies, no clinical variables describing the severity of illness (e.g. Simplified Acute Physiology Score (SAPS) III etc.) were obtainable from the registries, and so there may have been a subsequent lack of important factors that could have been built into the statistical models. The strengths of the study were that all patients with a diagnosis of NSTI nationwide were included, resulting in a precise estimate of the national incidence. The diagnoses for Charlson comorbidities, as well as the codes describing the supportive modalities have shown generally high positive predictive values when obtained from the DNPR [19]. Moreover, the present study included data from a large sample size derived over approximately 14 years with a high follow-up rate.

In conclusion, this nationwide study showed that incidence of NSTI is increasing, although mortality rates remain high and largely unaltered. Age, female sex and increasing comorbidities were statistically significant independent factors associated with increased mortality. Admission to a high-volume NSTI

1  
2  
3  
4 hospital was associated with lower mortality. In centres treating >8 patients per year, HBOT was associated  
5 with decreased odds for mortality.  
6  
7

8  
9 Contributions: Study planning (MH, MBM, LBM, OH), data analysis (MH, MBM), results interpretation (MH,  
10 MBM, LBM, OH), drafting manuscript (MH, OH), revision and approval of final version of manuscript (MH,  
11 MBM, LBM, OH). The corresponding author attests that all listed authors meet authorship criteria and that  
12 no others meeting the criteria have been omitted. Corresponding author serves as guarantor for the  
13 present study.  
14  
15  
16  
17

18  
19 Transparency: The lead author (MH) affirms that the manuscript is an honest, accurate, and transparent  
20 account of the study being reported; that no important aspects of the study have been omitted; and that  
21 any discrepancies from the study as originally planned have been explained.  
22  
23  
24

25  
26 Ethical approval: Not required  
27  
28

29  
30 Funding source: This work was supported by “Copenhagen University Hospital (Rigshospitalet) Research  
31 Grant” (grant number R167-A7352-B3897), which included a research fellowship for MH. Moreover, the  
32 study was supported by the projects of PERMIT (grant number 8113-00009B) funded by Innovation Fund  
33 Denmark and EU Horizon 2020 and PERAID (grant number 8114-00005B) funded by Innovation Fund  
34 Denmark and Nordforsk. No funders had any role in the design, conduct, collection, analysis, and  
35 interpretation of the data. Nor in the preparation, approval or submission of the manuscript.  
36  
37  
38  
39

40  
41 Data sharing: Data not available for sharing. For information on how to access to the Danish National  
42 Patient Registry, the Danish Civil Registration System and the Cause of Death Register, follow the  
43 instructions at <https://sundhedsdatastyrelsen.dk/forskertjeneste>  
44  
45  
46

47  
48 The Corresponding Author has the right to grant on behalf of all authors and does grant on behalf of all  
49 authors, an exclusive licence (or non exclusive for government employees) on a worldwide basis to the BMJ  
50 Publishing Group Ltd to permit this article (if accepted) to be published in BMJ editions and any other  
51 BMJPG products and sublicences such use and exploit all subsidiary rights, as set out in our licence.  
52  
53

54  
55 All authors have completed the *Unified Competing Interest form* (available on request from the  
56 corresponding author) and declare: no support from any organisation for the submitted work; no financial  
57  
58  
59  
60

1  
2  
3  
4  
5  
6  
7  
8  
9  
10  
11  
12  
13  
14  
15  
16  
17  
18  
19  
20  
21  
22  
23  
24  
25  
26  
27  
28  
29  
30  
31  
32  
33  
34  
35  
36  
37  
38  
39  
40  
41  
42  
43  
44  
45  
46  
47  
48  
49  
50  
51  
52  
53  
54  
55  
56  
57  
58  
59  
60

relationships with any organisations that might have an interest in the submitted work in the previous three years, no other relationships or activities that could appear to have influenced the submitted work.

Competing interests: None declared

For peer review only

## References

- 1 Stevens DL, Bryant AE. Necrotizing Soft-Tissue Infections. *N Engl J Med* 2017;**377**:2253–65. doi:10.1056/NEJMra1600673
- 2 Madsen MB, Skrede S, Perner A, *et al.* Patient's characteristics and outcomes in necrotising soft - tissue infections : results from a Scandinavian, multicentre, prospective cohort study. *Intensive Care Med* 2019;**45**:1241–51. doi:10.1007/s00134-019-05730-x
- 3 SUDARSKY LA, LASCHINGER JC, COPPA GF, *et al.* Improved Results from a Standardized Approach in Treating Patients with Necrotizing Fasciitis. *Ann Surg* 1987;**104**:661–5. doi:10.1097/00000658-198711000-00018
- 4 Brandt MM, Corpron CA, Wahl WL. Necrotizing soft tissue infections: a surgical disease. *Am Surg* 2000;**66**:961–7.
- 5 Elliott DC, Kufera JA, Myers RA. Necrotizing soft tissue infections. Risk factors for mortality and strategies for management. *Ann Surg* 1996;**224**:672–83. <http://ovidsp.ovid.com/ovidweb.cgi?T=JS&PAGE=reference&D=medc2&NEWS=N&AN=8916882>
- 6 Stamenkovic I, Lew PD. Early recognition of potentially fatal necrotizing fasciitis. The use of frozen-section biopsy. *N Engl J Med* 1984;**310**:1689–93. doi:10.1056/NEJM198406283102601
- 7 Boyer A, Vargas F, Coste F, *et al.* Influence of surgical treatment timing on mortality from necrotizing soft tissue infections requiring intensive care management. *Intensive Care Med* 2009;**35**:847–53. doi:10.1007/s00134-008-1373-4
- 8 Wong CH, Chang HC, Pasupathy S, *et al.* Necrotizing fasciitis: Clinical presentation, microbiology, and determinants of mortality. *J Bone Jt Surg - Ser A* 2003;**85**:1454–60. doi:10.2106/00004623-200308000-00005
- 9 Majeski JA, Alexander JW. Early diagnosis, nutritional support, and immediate extensive debridement improve survival in necrotizing fasciitis. *Am J Surg* 1983;**145**:784–7. doi:10.1016/0002-9610(83)90140-X
- 10 Majeski J, Majeski E. Necrotizing fasciitis: Improved survival with early recognition by tissue biopsy and aggressive surgical treatment. *South Med J* 1997;**90**:1065–8. doi:10.1097/00007611-199711000-00001

1  
2  
3  
4  
5  
6  
7  
8  
9  
10  
11  
12  
13  
14  
15  
16  
17  
18  
19  
20  
21  
22  
23  
24  
25  
26  
27  
28  
29  
30  
31  
32  
33  
34  
35  
36  
37  
38  
39  
40  
41  
42  
43  
44  
45  
46  
47  
48  
49  
50  
51  
52  
53  
54  
55  
56  
57  
58  
59  
60

- 11 Freischlag JA, Ajalat G, Busuttill RW. Treatment of necrotizing soft tissue infections. The need for a new approach. *Am J Surg* 1985;**149**:751–5. doi:10.1016/S0002-9610(85)80180-X
- 12 Devaney P, Frawley G, Frawley L, *et al.* Necrotising soft tissue infections: The effect of hyperbaric oxygen on mortality. *Anaesth Intensive Care* 2015;**43**:685–92. doi:10.1177/0310057X1504300604
- 13 Shaw JJ, Psoinos C, Emhoff TA, *et al.* Not Just Full of Hot Air : Hyperbaric Oxygen Therapy Increases Survival in Cases of Necrotizing Soft Tissue Infections. *Surg Infect (Larchmt)* 2014;**15**:328–35. doi:10.1089/sur.2012.135
- 14 Soh CR, Pietrobon R, Freiburger JJ, *et al.* Hyperbaric oxygen therapy in necrotising soft tissue infections: a study of patients in the United States Nationwide Inpatient Sample. *Intensive Care Med* 2012;**38**:1143–51. doi:10.1007/s00134-012-2558-4
- 15 D. L, M.H. B, Levett D, *et al.* Adjunctive hyperbaric oxygen for necrotizing fasciitis. *Cochrane database Syst Rev* 2015;**1**:CD007937. doi:http://dx.doi.org/10.1002/14651858.CD007937.pub2
- 16 Sartelli M, Guirao X, Hardcastle TC, *et al.* 2018 WSES/SIS-E consensus conference: Recommendations for the management of skin and soft-tissue infections. *World J Emerg Surg* 2018;**13**:1–24. doi:10.1186/s13017-018-0219-9
- 17 Stevens DL, Bisno AL, Chambers HF, *et al.* Practice guidelines for the diagnosis and management of skin and soft tissue infections: 2014 update by the infectious diseases society of America. *Clin Infect Dis* 2014;**59**. doi:10.1093/cid/ciu296
- 18 Audureau E, Hua C, de Prost N, *et al.* Mortality of necrotizing fasciitis: relative influence of individual and hospital-level factors, a nationwide multilevel study, France, 2007–12. *Br J Dermatol* 2017;**177**:1575–82. doi:10.1111/bjd.15615
- 19 Schmidt M, Schmidt SAJ, Sandegaard JL, *et al.* The Danish National Patient Registry: a review of content, data quality, and research potential. *Clin Epidemiol* 2015;**7**:449–90. doi:10.2147/CLEP.S91125
- 20 Schmidt M, Pedersen L, Sorensen HT. The Danish Civil Registration System as a tool in epidemiology. *Eur J Epidemiol* 2014;**29**:541–9. doi:10.1007/s10654-014-9930-3
- 21 Helweg-Larsen K. The Danish Register of Causes of Death. *Scand J Public Health* 2011;**39**:26–9. doi:10.1177/1403494811399958
- 22 Charlson ME, Pompei P, Ales KL, *et al.* A new method of classifying prognostic comorbidity in

- 1  
2  
3  
4 longitudinal studies: development and validation. *J Chronic Dis* 1987;**40**:373–83. doi:10.1016/0021-  
5 9681(87)90171-8  
6  
7
- 8 23 Quan H, Li B, Couris CM, *et al.* Updating and validating the charlson comorbidity index and score for  
9 risk adjustment in hospital discharge abstracts using data from 6 countries. *Am J Epidemiol*  
10 2011;**173**:676–82. doi:10.1093/aje/kwq433  
11  
12
- 13 24 Benchimol EI, Smeeth L, Guttman A, *et al.* The REporting of studies Conducted using Observational  
14 Routinely-collected health Data (RECORD) statement. *PLoS Med* 2015;**12**:e1001885.  
15 doi:10.1371/journal.pmed.1001885  
16  
17
- 18 25 Khamnuan P, Chongruksut W, Jearwattanakanok K, *et al.* Necrotizing fasciitis: Epidemiology and  
19 clinical predictors for amputation. *Int J Gen Med* 2015;**8**:195–202. doi:10.2147/IJGM.S82999  
20  
21
- 22 26 Das DK, Baker MG, Venugopal K. Increasing incidence of necrotizing fasciitis in New Zealand: a  
23 nationwide study over the period 1990 to 2006. *J Infect* 2011;**63**:429–33.  
24 doi:10.1016/j.jinf.2011.07.019  
25  
26
- 27 27 Naseer U, Steinbakk M, Blystad H, *et al.* Epidemiology of invasive group A streptococcal infections in  
28 Norway 2010–2014: A retrospective cohort study. *Eur J Clin Microbiol Infect Dis* 2016;**35**:1639–48.  
29 doi:10.1007/s10096-016-2704-y  
30  
31
- 32 28 Dixon B. Fasciitis continues to surprise. *Lancet Infect Dis* 2008;**8**:279. doi:10.1016/S1473-  
33 3099(08)70081-1  
34  
35
- 36 29 Soltani AM, Best MJ, Francis CS, *et al.* Trends in the incidence and treatment of necrotizing soft  
37 tissue infections: An analysis of the national hospital discharge survey. *J Burn Care Res* 2014;**35**:449–  
38 54. doi:10.1097/BCR.000000000000010  
39  
40
- 41 30 Fernando SM, Tran A, Cheng W, *et al.* Necrotizing Soft Tissue Infection: Diagnostic Accuracy of  
42 Physical Examination, Imaging, and LRINEC Score: A Systematic Review and Meta-Analysis. *Ann Surg*  
43 2019;**269**:58–65. doi:10.1097/SLA.0000000000002774  
44  
45
- 46 31 Levenson RB, Singh AK, Novelline RA. Fournier gangrene: role of imaging. *Radiographics*  
47 2008;**28**:519–28. doi:10.1148/rg.282075048  
48  
49
- 50 32 Nougue H, Le Maho A-L, Boudiaf M, *et al.* Clinical and imaging factors associated with severe  
51 complications of cervical necrotizing fasciitis. *Intensive Care Med* 2015;**41**:1256–63.  
52 doi:10.1007/s00134-015-3830-1  
53  
54  
55  
56  
57  
58  
59  
60

1  
2  
3  
4  
5  
6  
7  
8  
9  
10  
11  
12  
13  
14  
15  
16  
17  
18  
19  
20  
21  
22  
23  
24  
25  
26  
27  
28  
29  
30  
31  
32  
33  
34  
35  
36  
37  
38  
39  
40  
41  
42  
43  
44  
45  
46  
47  
48  
49  
50  
51  
52  
53  
54  
55  
56  
57  
58  
59  
60

- 33 Wong C-H, Khin L-W, Heng K-S, *et al.* The LRINEC (Laboratory Risk Indicator for Necrotizing Fasciitis) score: a tool for distinguishing necrotizing fasciitis from other soft tissue infections. *Crit Care Med* 2004;**32**:1535–41. doi:10.1097/01.ccm.0000129486.35458.7d
- 34 Bechar J, Sepehrpour S, Hardwicke J, *et al.* Laboratory risk indicator for necrotising fasciitis (LRINEC) score for the assessment of early necrotising fasciitis: a systematic review of the literature. *Ann R Coll Surg Engl* 2017;**99**:341–6. doi:10.1308/rcsann.2017.0053
- 35 Hansen MB, Rasmussen LS, Svensson M, *et al.* Association between cytokine response, the LRINEC score and outcome in patients with necrotising soft tissue infection: a multicentre, prospective study. *Sci Rep* 2017;**7**:42179. doi:10.1038/srep42179
- 36 Lauridsen MD, Gammelager H, Schmidt M, *et al.* Positive predictive value of International Classification of Diseases, 10th revision, diagnosis codes for cardiogenic, hypovolemic, and septic shock in the Danish National Patient Registry. *BMC Med Res Methodol* 2015;**15**:23. doi:10.1186/s12874-015-0013-2
- 37 Stevenson EK, Rubenstein AR, Radin GT, *et al.* Two decades of mortality trends among patients with severe sepsis: A comparative meta-Analysis. *Crit Care Med* 2014;**42**:625–31. doi:10.1097/CCM.0000000000000026
- 38 Rudd KE, Johnson SC, Agesa KM, *et al.* Global, regional, and national sepsis incidence and mortality, 1990 – 2017: analysis for the Global Burden of Disease study. *Lancet* 2020;**6736**:1–12. doi:10.1016/S0140-6736(19)32989-7
- 39 Sperling C, Noer MC, Christensen IJ, *et al.* Comorbidity is an independent prognostic factor for the survival of ovarian cancer: A Danish register-based cohort study from a clinical database. *Gynecol Oncol* 2013;**129**:97–102. doi:10.1016/j.ygyno.2012.12.039
- 40 Raedkjaer M, Maretty-Kongstad K, Baad-Hansen T, *et al.* The impact of comorbidity on mortality in danish sarcoma patients from 2000-2013: A nationwide population-based multicentre study. *PLoS One* 2018;**13**:1–13. doi:10.1371/journal.pone.0198933
- 41 Cronin-Fenton DP, Nørgaard M, Jacobsen J, *et al.* Comorbidity and survival of Danish breast cancer patients from 1995 to 2005. *Br J Cancer* 2007;**96**:1462–8. doi:10.1038/sj.bjc.6603717
- 42 Stavem K, Hoel H, Skjaker SA, *et al.* Charlson comorbidity index derived from chart review or administrative data: Agreement and prediction of mortality in intensive care patients. *Clin Epidemiol* 2017;**9**:311–20. doi:10.2147/CLEP.S133624

- 1  
2  
3  
4 43 Quan H, Sundararajan V, Halfon P, *et al*. Coding algorithms for defining comorbidities in ICD-9-CM  
5 and ICD-10 administrative data. *Med Care* 2005;**43**:1130–9.  
6  
7 doi:10.1097/01.mlr.0000182534.19832.83  
8  
9  
10 44 Thygesen SK, Christiansen CF, Christensen S, *et al*. The predictive value of ICD-10 diagnostic coding  
11 used to assess Charlson comorbidity index conditions in the population-based Danish National  
12 Registry of Patients. *BMC Med Res Methodol* 2011;**11**:83. doi:10.1186/1471-2288-11-83  
13  
14  
15 45 Ingraham AM, Jung HS, Liepert AE, *et al*. Effect of transfer status on outcomes for necrotizing soft  
16 tissue infections. *J Surg Res* 2017;**220**:372–8. doi:10.1016/j.jss.2017.06.006  
17  
18  
19 46 Proud D, Bruscano Raiola F, Holden D, *et al*. Are we getting necrotizing soft tissue infections right? A  
20 10-year review. *ANZ J Surg* 2014;**84**:468–72. doi:10.1111/ans.12412  
21  
22  
23 47 Mathieu D, Marroni A, Kot J. Tenth European Consensus Conference on Hyperbaric Medicine:  
24 recommendations for accepted and non-accepted clinical indications and practice of hyperbaric  
25 oxygen treatment. *Diving Hyperb Med* 2017;**47**:24–32. doi:10.28920/dhm47.1.24-32  
26  
27  
28 48 Bakker D. Clostridial Myonecrosis (gas gangrene). In: Weaver LK, ed. *Hyperbaric oxygen therapy*  
29 *Indications*. Best Publishing Company 2014. 114–25.  
30  
31  
32 49 Jacoby I. Necrotizing soft tissue infections. *Hyperb Oxyg Ther Indic* 2014;**39**:739–  
33  
34  
35 52. <http://ovidsp.ovid.com/ovidweb.cgi?T=JS&PAGE=reference&D=med9&NEWS=N&AN=22670555>  
36  
37  
38  
39  
40  
41  
42  
43  
44  
45  
46  
47  
48  
49  
50  
51  
52  
53  
54  
55  
56  
57  
58  
59  
60



1  
2  
3  
4  
5  
6  
7  
8  
9  
10  
11  
12  
13  
14  
15  
16  
17  
18  
19  
20  
21  
22  
23  
24  
25  
26  
27  
28  
29  
30  
31  
32  
33  
34  
35  
36  
37  
38  
39  
40  
41  
42  
43  
44  
45  
46  
47  
48  
49  
50  
51  
52  
53  
54  
55  
56  
57  
58  
59  
60

### Figure legends

Fig 1. Yearly incidences of necrotizing soft tissue infection in Denmark. The solid line describes the trend by regression analysis; the dotted lines represent the 95% confidence intervals. NSTI; necrotizing soft tissue infection.

Fig 2. Survival curve for patients with necrotizing soft tissue infection. The solid line represents the survival curve. The grey area represents the 95% confidence interval. The survival curve was censored at day 90.

For peer review only

**Table 1. Patients' Characteristics**

|                    |                                             |            |
|--------------------|---------------------------------------------|------------|
| Patients (n=1527)  |                                             |            |
|                    | Age (years)                                 | 62 [50–72] |
|                    | Sex, male                                   | 966 (63%)  |
| Comorbidities      |                                             |            |
|                    | Myocardial infarction                       | 118 (8%)   |
|                    | Congestive heart failure                    | 227 (15%)  |
|                    | Peripheral vascular disease                 | 238 (16%)  |
|                    | Cerebrovascular disease                     | 235 (15%)  |
|                    | Dementia                                    | 53 (4%)    |
|                    | Chronic pulmonary disease                   | 283 (19%)  |
|                    | Rheumatologic disease                       | 87 (6%)    |
|                    | Peptic ulcer disease                        | 116 (8%)   |
|                    | Mild liver disease                          | 126 (8%)   |
|                    | Moderate or severe liver disease            | 63 (4%)    |
|                    | Diabetes without chronic complications      | 431 (28%)  |
|                    | Diabetes with chronic complications         | 228 (15%)  |
|                    | Hemiplegia or paraplegia                    | 40 (3%)    |
|                    | Renal disease                               | 201 (13%)  |
|                    | Cancer (any malignancy)                     | 330 (22%)  |
|                    | Metastatic solid tumor                      | 80 (5%)    |
|                    | HIV/AIDS                                    | 11 (1%)    |
|                    | Charlson score                              | 1 [0-2]    |
|                    | Charlson Comorbidity index                  |            |
|                    | 0                                           | 398 (26%)  |
|                    | 1-2                                         | 759 (50%)  |
|                    | 3-4                                         | 286 (19%)  |
|                    | ≥ 5                                         | 84 (6%)    |
|                    | Weighted Charlson score                     | 2 [0-4]    |
|                    | Weighted Charlson Comorbidity index         |            |
|                    | 0                                           | 398 (26%)  |
|                    | 1-2                                         | 506 (33%)  |
|                    | 3-4                                         | 330 (22%)  |
|                    | ≥ 5                                         | 293 (19%)  |
| Hospital category* |                                             |            |
|                    | Low volume (< 8 NSTI/year)                  | 419 (27%)  |
|                    | High volume (≥ 8 NSTI/year)                 | 1108 (73%) |
| Period (year)      |                                             |            |
|                    | 2005–2011                                   | 694 (45%)  |
|                    | 2012–2018                                   | 833 (55%)  |
| Other              |                                             |            |
|                    | Septic shock                                | 472 (31%)  |
|                    | Surgery <4 weeks prior to diagnosis of NSTI | 260 (17%)  |

Data are presented as n (%) or median [IQR]. Comorbidity diagnoses from 10 years prior until NSTI diagnosis. Each comorbidity was defined as by the Charlson conditions (ICD-10 diagnoses in Appendix). Septic shock was defined as the ICD-10 diagnosis "Septic shock" or "Sepsis" and a concurrent diagnosis of inotropes (Diagnoses and supportive modalities in Appendix). IQR, interquartile range; NSTI, necrotizing soft tissue infection. \*Defined as the lowest number of NSTI cases annually treated at one of the three main teaching hospitals in Denmark.

1  
2  
3  
4  
5  
6  
7  
8  
9  
10  
11  
12  
13  
14  
15  
16  
17  
18  
19  
20  
21  
22  
23  
24  
25  
26  
27  
28  
29  
30  
31  
32  
33  
34  
35  
36  
37  
38  
39  
40  
41  
42  
43  
44  
45  
46  
47  
48  
49  
50  
51  
52  
53  
54  
55  
56  
57  
58  
59  
60**Table 2. Interventions in patients with NSTI.**

|                                                   |  |               |
|---------------------------------------------------|--|---------------|
| Surgery                                           |  |               |
| Amputations                                       |  | 111 (7.7%)    |
| Number of surgical interventions                  |  | 6 [3–10]      |
| Supportive modalities                             |  |               |
| Admission to intensive care unit                  |  | 1506 (99%)    |
| Mechanical ventilation                            |  | 1317 (86%)    |
| Use of vasopressor/inotrope                       |  | 1095 (72%)    |
| Renal-replacement therapy, at least one treatment |  | 268 (18%)     |
| HBOT, at any time                                 |  | 554 (36%)     |
| Hours from diagnosis to first HBOT                |  | 4.2 [2.1–6.2] |
| Number of HBOT                                    |  | 3 [2–3]       |
| ≥2 HBOT within 24 hours                           |  | 252 (45%)     |

Procedures/interventions within 7 days from NSTI diagnosis. Data are presented as n (%) or median [IQR]. IQR, interquartile range; HBOT, Hyperbaric Oxygen Therapy; NSTI, necrotizing soft tissue infection.

**Table 3. All-cause mortality across severity of comorbidity.**

| Weighted Charlson Index | 30-day mortality         | 90-day mortality         | 1-year mortality*        |
|-------------------------|--------------------------|--------------------------|--------------------------|
| 0                       | 11.4% (95%CI: 8.5-15.0)  | 13.7% (95%CI: 11.6-18.9) | 15.4% (95%CI: 11.8-19.5) |
| 1-2                     | 20.6% (95%CI: 17.1-24.4) | 26.3% (95%CI: 22.5-30.4) | 31.6% (95%CI: 27.4-36.1) |
| 3-4                     | 25.8% (95%CI: 21.1-30.8) | 30.6% (95%CI: 25.7-35.9) | 37.3% (95%CI: 31.9-42.9) |
| ≥ 5                     | 20.9% (95%CI: 16.4-26.0) | 32.9% (95%CI: 27.5-38.6) | 40.4% (95%CI: 34.6-46.4) |

\*Patients enrolled 2005–2017 (n=1429). CI, Confidence Interval.

**Table 4. Factors associated with 90-day mortality.**

| Patients (n=1521)                   | Crude OR (95% CI) | P-value | Adjusted OR (95% CI) | P-value |
|-------------------------------------|-------------------|---------|----------------------|---------|
| Age (years)                         | 1.06 (1.05–1.08)  | <0.001  | 1.06 (1.05–1.07)     | <0.001  |
| Sex (male)                          | 0.69 (0.55–0.88)  | 0.002   | 0.72 (0.56–0.94)     | 0.01    |
| Weighted Charlson Comorbidity Index |                   |         |                      |         |
| 0                                   | 1 (Ref.)          |         | 1 (Ref.)             |         |
| 1–2                                 | 2.27 (1.61–3.24)  | <0.001  | 1.50 (1.03–2.21)     | 0.04    |
| 3–4                                 | 2.81 (1.95–4.09)  | <0.001  | 1.64 (1.09–2.48)     | 0.02    |
| ≥ 5                                 | 3.10 (2.14–4.55)  | <0.001  | 1.96 (1.31–2.96)     | 0.001   |
| Hospital category*                  |                   |         |                      |         |
| < 8 NSTI/year                       | 1 (Ref.)          |         | 1 (Ref.)             |         |
| ≥ 8 NSTI/year                       | 0.48 (0.38–0.61)  | <0.001  | 0.59 (0.45–0.77)     | <0.001  |
| Period (year)                       |                   |         |                      |         |
| 2005–2011                           | 1 (Ref.)          |         | 1 (Ref.)             |         |
| 2012–2018                           | 1.10 (0.87–1.38)  | 0.44    | 0.98 (0.76–1.27)     | 0.89    |
| HBOT treated individuals (n=554)    |                   |         |                      |         |
| Number of HBOT, total               |                   |         |                      |         |
| 1                                   | 1 (Ref.)          |         | 1 (Ref.)             |         |
| 2                                   | 0.72 (0.37–1.41)  | 0.34    | 0.83 (0.38–1.80)     | 0.64    |
| 3                                   | 0.49 (0.25–0.94)  | 0.03    | 0.49 (0.22–1.05)     | 0.07    |
| Sessions within 24 hours            |                   |         |                      |         |
| ≥ 2 HBOT                            | 1 (Ref.)          |         | 1 (Ref.)             |         |
| <2 HBOT                             | 1.45 (0.89–2.41)  | 0.14    | 1.37 (0.73–2.59)     | 0.34    |

Multivariable logistic regression model adjusted for age, sex and weighted Charlson Comorbidity Index. Six (n=6) patients were lost to follow-up and were not included in the analyses. OR, Odds ratio; CI, Confidence Interval; HBOT, Hyperbaric Oxygen Therapy; NSTI, Necrotizing soft tissue infection. \*Defined as the lowest number of NSTI cases annually treated at one of the three main teaching hospitals in Denmark.

**Box 1. What is known and what this study adds.**

What is already known on this topic:

- Cohort studies of patients with NSTI have highlighted the severity of disease
- Findings on the association between patient-related risk factors and mortality are inconsistent.
- A description of incidence, comorbidities, treatment modalities and mortality are missing in the nationwide cohort of patients with NSTI.

What this study adds:

- Our study shows that the nationwide incidence of NSTI has increased while mortality rates remain high.
- Higher age, female sex and increasing number of comorbidities were independent risk factors for 90-day mortality, while treatment at high-volume hospitals decreased the risk of death.
- In contrast to other countries, hyperbaric oxygen therapy is a frequently used treatment modality for NSTI in Denmark.

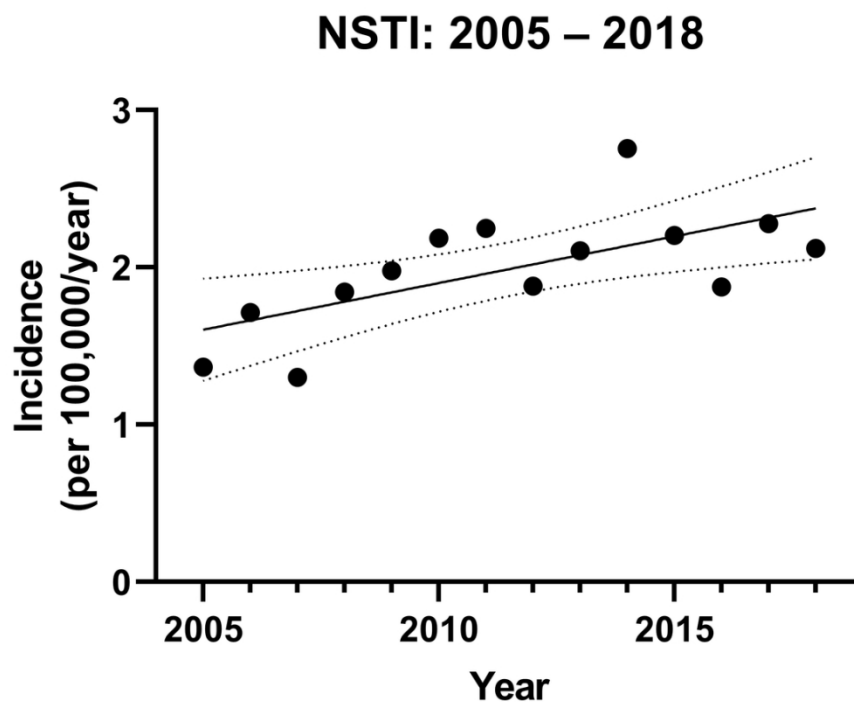

31  
32  
33  
34  
35  
36  
37  
38  
39  
40  
41  
42  
43  
44  
45  
46  
47  
48  
49  
50  
51  
52  
53  
54  
55  
56  
57  
58  
59  
60

Figure 1. Yearly incidences of necrotizing soft tissue infection in Denmark. The solid line describes the trend by regression analysis; the dotted lines represent the 95% confidence intervals. NSTI; necrotizing soft tissue infection.

107x82mm (300 x 300 DPI)

1  
2  
3  
4  
5  
6  
7  
8  
9  
10  
11  
12  
13  
14  
15  
16  
17  
18  
19  
20  
21  
22  
23  
24  
25  
26  
27  
28  
29  
30  
31  
32  
33  
34  
35  
36

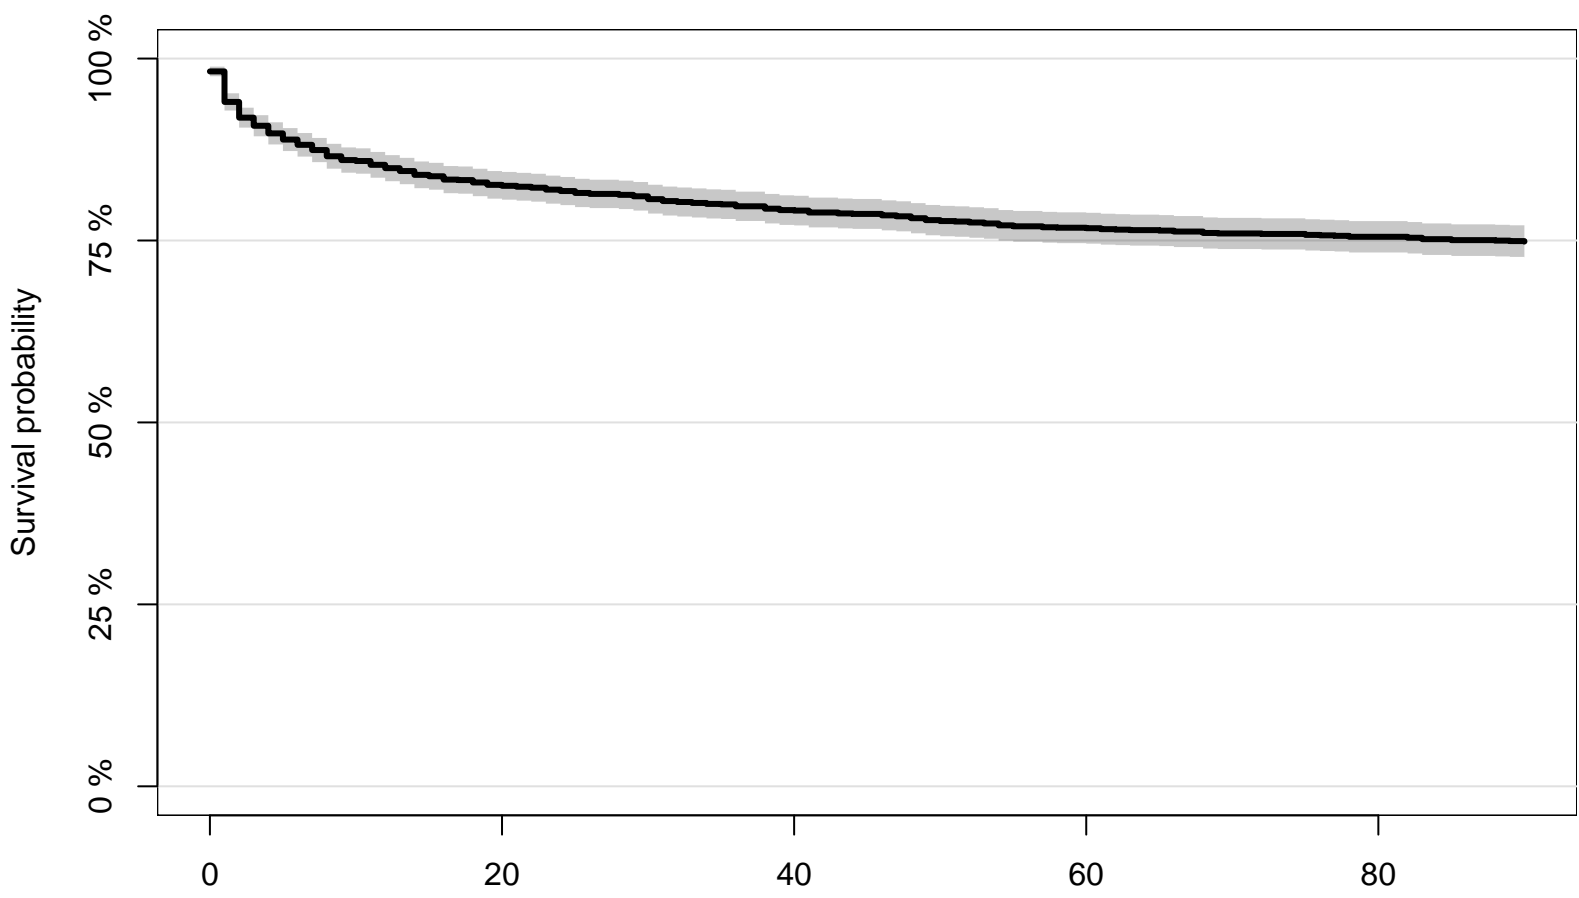

Subjects: 1527    1322    1272    1243    1221    1201    1181    1168    1160    1153    1144

**The RECORD statement – checklist of items, extended from the STROBE statement, that should be reported in observational studies using routinely collected health data.**

|                           | Item No. | STROBE items                                                                                                                                                                               | Location in manuscript where items are reported | RECORD items                                                                                                                                                                                                                                                                                                                                                                                                                                | Location in manuscript where items are reported                      |
|---------------------------|----------|--------------------------------------------------------------------------------------------------------------------------------------------------------------------------------------------|-------------------------------------------------|---------------------------------------------------------------------------------------------------------------------------------------------------------------------------------------------------------------------------------------------------------------------------------------------------------------------------------------------------------------------------------------------------------------------------------------------|----------------------------------------------------------------------|
| <b>Title and abstract</b> |          |                                                                                                                                                                                            |                                                 |                                                                                                                                                                                                                                                                                                                                                                                                                                             |                                                                      |
|                           | 1        | (a) Indicate the study's design with a commonly used term in the title or the abstract (b) Provide in the abstract an informative and balanced summary of what was done and what was found |                                                 | RECORD 1.1: The type of data used should be specified in the title or abstract. When possible, the name of the databases used should be included.<br><br>RECORD 1.2: If applicable, the geographic region and timeframe within which the study took place should be reported in the title or abstract.<br><br>RECORD 1.3: If linkage between databases was conducted for the study, this should be clearly stated in the title or abstract. | Title, abstract and material and methods (1 <sup>st</sup> paragraph) |
| <b>Introduction</b>       |          |                                                                                                                                                                                            |                                                 |                                                                                                                                                                                                                                                                                                                                                                                                                                             |                                                                      |
| Background rationale      | 2        | Explain the scientific background and rationale for the investigation being reported                                                                                                       |                                                 |                                                                                                                                                                                                                                                                                                                                                                                                                                             | Introduction, paragraph 1-3                                          |
| Objectives                | 3        | State specific objectives, including any prespecified hypotheses                                                                                                                           |                                                 |                                                                                                                                                                                                                                                                                                                                                                                                                                             | Introduction paragraph 4                                             |
| <b>Methods</b>            |          |                                                                                                                                                                                            |                                                 |                                                                                                                                                                                                                                                                                                                                                                                                                                             |                                                                      |
| Study Design              | 4        | Present key elements of study design early in the paper                                                                                                                                    |                                                 |                                                                                                                                                                                                                                                                                                                                                                                                                                             | Title, abstract, Material and Methods 1 <sup>st</sup> paragraph      |
| Setting                   | 5        | Describe the setting, locations, and relevant dates, including                                                                                                                             |                                                 |                                                                                                                                                                                                                                                                                                                                                                                                                                             | Material and Methods 1 <sup>st</sup> paragraph                       |



|                           |   |                                                                                                                                                                                                                                                                                                                                                                                                                                                                                                                                                                                                                                                                                                                              |  |                                                                                                                                                                                                                                                                                                                                                                                                                                                                                                                                                                                                                                                                                                      |                                                                                                                                                                                                                                                |
|---------------------------|---|------------------------------------------------------------------------------------------------------------------------------------------------------------------------------------------------------------------------------------------------------------------------------------------------------------------------------------------------------------------------------------------------------------------------------------------------------------------------------------------------------------------------------------------------------------------------------------------------------------------------------------------------------------------------------------------------------------------------------|--|------------------------------------------------------------------------------------------------------------------------------------------------------------------------------------------------------------------------------------------------------------------------------------------------------------------------------------------------------------------------------------------------------------------------------------------------------------------------------------------------------------------------------------------------------------------------------------------------------------------------------------------------------------------------------------------------------|------------------------------------------------------------------------------------------------------------------------------------------------------------------------------------------------------------------------------------------------|
|                           |   | periods of recruitment, exposure, follow-up, and data collection                                                                                                                                                                                                                                                                                                                                                                                                                                                                                                                                                                                                                                                             |  |                                                                                                                                                                                                                                                                                                                                                                                                                                                                                                                                                                                                                                                                                                      |                                                                                                                                                                                                                                                |
| Participants              | 6 | <p>(a) <i>Cohort study</i> - Give the eligibility criteria, and the sources and methods of selection of participants. Describe methods of follow-up</p> <p><i>Case-control study</i> - Give the eligibility criteria, and the sources and methods of case ascertainment and control selection. Give the rationale for the choice of cases and controls</p> <p><i>Cross-sectional study</i> - Give the eligibility criteria, and the sources and methods of selection of participants</p> <p>(b) <i>Cohort study</i> - For matched studies, give matching criteria and number of exposed and unexposed</p> <p><i>Case-control study</i> - For matched studies, give matching criteria and the number of controls per case</p> |  | <p>RECORD 6.1: The methods of study population selection (such as codes or algorithms used to identify subjects) should be listed in detail. If this is not possible, an explanation should be provided.</p> <p>RECORD 6.2: Any validation studies of the codes or algorithms used to select the population should be referenced. If validation was conducted for this study and not published elsewhere, detailed methods and results should be provided.</p> <p>RECORD 6.3: If the study involved linkage of databases, consider use of a flow diagram or other graphical display to demonstrate the data linkage process, including the number of individuals with linked data at each stage.</p> | <p>Material and Methods 2<sup>nd</sup> paragraph (Data collection) includes ICD-10 codes for population selection.</p> <p>Linkage between registries described 1<sup>st</sup> paragraph of Material and Methods. No flow diagram attached.</p> |
| Variables                 | 7 | Clearly define all outcomes, exposures, predictors, potential confounders, and effect modifiers. Give diagnostic criteria, if applicable.                                                                                                                                                                                                                                                                                                                                                                                                                                                                                                                                                                                    |  | RECORD 7.1: A complete list of codes and algorithms used to classify exposures, outcomes, confounders, and effect modifiers should be provided. If these cannot be reported, an explanation should be provided.                                                                                                                                                                                                                                                                                                                                                                                                                                                                                      | All variables (ICD-10 codes or SKS-codes) listed in Supplemental Appendix A.                                                                                                                                                                   |
| Data sources/ measurement | 8 | For each variable of interest, give sources of data and details of methods of assessment (measurement).                                                                                                                                                                                                                                                                                                                                                                                                                                                                                                                                                                                                                      |  |                                                                                                                                                                                                                                                                                                                                                                                                                                                                                                                                                                                                                                                                                                      | Material and Methods, paragraph 2+3                                                                                                                                                                                                            |

|                        |    |                                                                                                                                                                                                                                                                                                                                                               |  |                                                                                                                                                                                    |
|------------------------|----|---------------------------------------------------------------------------------------------------------------------------------------------------------------------------------------------------------------------------------------------------------------------------------------------------------------------------------------------------------------|--|------------------------------------------------------------------------------------------------------------------------------------------------------------------------------------|
|                        |    | Describe comparability of assessment methods if there is more than one group                                                                                                                                                                                                                                                                                  |  |                                                                                                                                                                                    |
| Bias                   | 9  | Describe any efforts to address potential sources of bias                                                                                                                                                                                                                                                                                                     |  | Material and Methods (last paragraph including statistical analysis). Moreover, potential biases which were not included are addressed in “limitations” section of the discussion. |
| Study size             | 10 | Explain how the study size was arrived at                                                                                                                                                                                                                                                                                                                     |  | -                                                                                                                                                                                  |
| Quantitative variables | 11 | Explain how quantitative variables were handled in the analyses. If applicable, describe which groupings were chosen, and why                                                                                                                                                                                                                                 |  | Material and Methods (statistical analysis)                                                                                                                                        |
| Statistical methods    | 12 | (a) Describe all statistical methods, including those used to control for confounding<br>(b) Describe any methods used to examine subgroups and interactions<br>(c) Explain how missing data were addressed<br>(d) <i>Cohort study</i> - If applicable, explain how loss to follow-up was addressed<br><i>Case-control study</i> - If applicable, explain how |  | Material and Methods (statistical analysis)                                                                                                                                        |

|                                  |    |                                                                                                                                                                                                                                                                                                                                     |  |                                                                                                                                                                                                                                                                                                                         |                                                                                                                 |
|----------------------------------|----|-------------------------------------------------------------------------------------------------------------------------------------------------------------------------------------------------------------------------------------------------------------------------------------------------------------------------------------|--|-------------------------------------------------------------------------------------------------------------------------------------------------------------------------------------------------------------------------------------------------------------------------------------------------------------------------|-----------------------------------------------------------------------------------------------------------------|
|                                  |    | <p>matching of cases and controls was addressed</p> <p><i>Cross-sectional study</i> - If applicable, describe analytical methods taking account of sampling strategy</p> <p>(e) Describe any sensitivity analyses</p>                                                                                                               |  |                                                                                                                                                                                                                                                                                                                         |                                                                                                                 |
| Data access and cleaning methods |    | ..                                                                                                                                                                                                                                                                                                                                  |  | <p>RECORD 12.1: Authors should describe the extent to which the investigators had access to the database population used to create the study population.</p> <p>RECORD 12.2: Authors should provide information on the data cleaning methods used in the study.</p>                                                     | <p>Material and Methods + information on how to retrieve data from DNPR included in “Data Sharing” section.</p> |
| Linkage                          |    | ..                                                                                                                                                                                                                                                                                                                                  |  | <p>RECORD 12.3: State whether the study included person-level, institutional-level, or other data linkage across two or more databases. The methods of linkage and methods of linkage quality evaluation should be provided.</p>                                                                                        | <p>Material and Methods 1<sup>st</sup> paragraph (Person-level)</p>                                             |
| <b>Results</b>                   |    |                                                                                                                                                                                                                                                                                                                                     |  |                                                                                                                                                                                                                                                                                                                         |                                                                                                                 |
| Participants                     | 13 | <p>(a) Report the numbers of individuals at each stage of the study (<i>e.g.</i>, numbers potentially eligible, examined for eligibility, confirmed eligible, included in the study, completing follow-up, and analysed)</p> <p>(b) Give reasons for non-participation at each stage.</p> <p>(c) Consider use of a flow diagram</p> |  | <p>RECORD 13.1: Describe in detail the selection of the persons included in the study (<i>i.e.</i>, study population selection) including filtering based on data quality, data availability and linkage. The selection of included persons can be described in the text and/or by means of the study flow diagram.</p> | <p>Material and Methods (Data Collection).</p>                                                                  |

|                                                                                                    |                  |    |                                                                                                                                                                                                                                                                                                                                                                                                                          |  |                                                                          |
|----------------------------------------------------------------------------------------------------|------------------|----|--------------------------------------------------------------------------------------------------------------------------------------------------------------------------------------------------------------------------------------------------------------------------------------------------------------------------------------------------------------------------------------------------------------------------|--|--------------------------------------------------------------------------|
| 1<br>2<br>3<br>4<br>5<br>6<br>7<br>8<br>9<br>10<br>11<br>12                                        | Descriptive data | 14 | (a) Give characteristics of study participants ( <i>e.g.</i> , demographic, clinical, social) and information on exposures and potential confounders<br>(b) Indicate the number of participants with missing data for each variable of interest<br>(c) <i>Cohort study</i> - summarise follow-up time ( <i>e.g.</i> , average and total amount)                                                                          |  | Results 1 <sup>st</sup> paragraph + Table 1                              |
| 13<br>14<br>15<br>16<br>17<br>18<br>19<br>20<br>21<br>22<br>23                                     | Outcome data     | 15 | <i>Cohort study</i> - Report numbers of outcome events or summary measures over time<br><i>Case-control study</i> - Report numbers in each exposure category, or summary measures of exposure<br><i>Cross-sectional study</i> - Report numbers of outcome events or summary measures                                                                                                                                     |  | Results section, Table 1+2                                               |
| 24<br>25<br>26<br>27<br>28<br>29<br>30<br>31<br>32<br>33<br>34<br>35<br>36<br>37<br>38<br>39<br>40 | Main results     | 16 | (a) Give unadjusted estimates and, if applicable, confounder-adjusted estimates and their precision ( <i>e.g.</i> , 95% confidence interval). Make clear which confounders were adjusted for and why they were included<br>(b) Report category boundaries when continuous variables were categorized<br>(c) If relevant, consider translating estimates of relative risk into absolute risk for a meaningful time period |  | Results + subsection "Mortality" including adjusted estimates + Table 4. |
| 41<br>42<br>43                                                                                     | Other analyses   | 17 | Report other analyses done— <i>e.g.</i> , analyses of subgroups and                                                                                                                                                                                                                                                                                                                                                      |  | -                                                                        |

44  
45  
46  
47

|                                                           |    |                                                                                                                                                                            |  |                                                                                                                                                                                                                                                                                                          |                                                                                                       |
|-----------------------------------------------------------|----|----------------------------------------------------------------------------------------------------------------------------------------------------------------------------|--|----------------------------------------------------------------------------------------------------------------------------------------------------------------------------------------------------------------------------------------------------------------------------------------------------------|-------------------------------------------------------------------------------------------------------|
|                                                           |    | interactions, and sensitivity analyses                                                                                                                                     |  |                                                                                                                                                                                                                                                                                                          |                                                                                                       |
| <b>Discussion</b>                                         |    |                                                                                                                                                                            |  |                                                                                                                                                                                                                                                                                                          |                                                                                                       |
| Key results                                               | 18 | Summarise key results with reference to study objectives                                                                                                                   |  |                                                                                                                                                                                                                                                                                                          | Discussion 1 <sup>st</sup> + 2 <sup>nd</sup> paragraph.                                               |
| Limitations                                               | 19 | Discuss limitations of the study, taking into account sources of potential bias or imprecision. Discuss both direction and magnitude of any potential bias                 |  | RECORD 19.1: Discuss the implications of using data that were not created or collected to answer the specific research question(s). Include discussion of misclassification bias, unmeasured confounding, missing data, and changing eligibility over time, as they pertain to the study being reported. | Discussion paragraph 8 “limitations”                                                                  |
| Interpretation                                            | 20 | Give a cautious overall interpretation of results considering objectives, limitations, multiplicity of analyses, results from similar studies, and other relevant evidence |  |                                                                                                                                                                                                                                                                                                          | Discussion, entire section.                                                                           |
| Generalisability                                          | 21 | Discuss the generalisability (external validity) of the study results                                                                                                      |  |                                                                                                                                                                                                                                                                                                          | Discussion paragraph 8.                                                                               |
| <b>Other Information</b>                                  |    |                                                                                                                                                                            |  |                                                                                                                                                                                                                                                                                                          |                                                                                                       |
| Funding                                                   | 22 | Give the source of funding and the role of the funders for the present study and, if applicable, for the original study on which the present article is based              |  |                                                                                                                                                                                                                                                                                                          | Subsection “Funding Sources”                                                                          |
| Accessibility of protocol, raw data, and programming code |    | ..                                                                                                                                                                         |  | RECORD 22.1: Authors should provide information on how to access any supplemental information such as the study protocol, raw data, or programming code.                                                                                                                                                 | Supplemental information (including ICD-10 + SKS-codes in Supplemental Appendix). How to asceses DNPR |

|  |  |  |  |  |                    |
|--|--|--|--|--|--------------------|
|  |  |  |  |  | in “Data Sharing”. |
|--|--|--|--|--|--------------------|

1  
2  
3  
4 \*Reference: Benchimol EI, Smeeth L, Guttman A, Harron K, Moher D, Petersen I, Sørensen HT, von Elm E, Langan SM, the RECORD Working  
5 Committee. The REporting of studies Conducted using Observational Routinely-collected health Data (RECORD) Statement. *PLoS Medicine* 2015;  
6 in press.  
7

8 \*Checklist is protected under Creative Commons Attribution ([CC BY](https://creativecommons.org/licenses/by/4.0/)) license.  
9  
10  
11  
12  
13  
14  
15  
16  
17  
18  
19  
20  
21  
22  
23  
24  
25  
26  
27  
28  
29  
30  
31  
32  
33  
34  
35  
36  
37  
38  
39  
40  
41  
42  
43  
44  
45  
46  
47

For peer review only

**Appendix 2: ICD-10 codes for Charlson Comorbidity Index**

|           |                             |
|-----------|-----------------------------|
| I21       | Myocardial infarction       |
| I22       |                             |
| I252      |                             |
| I099      | Congestive heart failure    |
| I110      |                             |
| I130      |                             |
| I132      |                             |
| I255      |                             |
| I420      |                             |
| I425-I429 |                             |
| I43       |                             |
| I50       |                             |
| P290      |                             |
| I70       | Peripheral vascular disease |
| I71       |                             |
| I731      |                             |
| I738      |                             |
| I739      |                             |
| I771      |                             |
| I790      |                             |
| I792      |                             |
| K551      |                             |
| K558      |                             |
| K559      |                             |
| Z958      |                             |
| Z959      |                             |
| G45       | Cerebrovascular disease     |
| G46       |                             |
| I60-I69   |                             |
| H340      |                             |
| F00-F03   | Dementia                    |
| G30       |                             |
| F051      |                             |
| G311      |                             |
| I278      | Chronic pulmonary disease   |
| I279      |                             |
| J40-J47   |                             |
| J60-J67   |                             |
| J684      |                             |
| J701      |                             |
| J703      | Rheumatologic disease       |
| M05       |                             |

1  
2  
3  
4  
5  
6  
7  
8  
9  
10  
11  
12  
13  
14  
15  
16  
17  
18  
19  
20  
21  
22  
23  
24  
25  
26  
27  
28  
29  
30  
31  
32  
33  
34  
35  
36  
37  
38  
39  
40  
41  
42  
43  
44  
45  
46  
47  
48  
49  
50  
51  
52  
53  
54  
55  
56  
57  
58  
59  
60

|         |                                       |
|---------|---------------------------------------|
| M06     |                                       |
| M315    |                                       |
| M32-M34 |                                       |
| M351    |                                       |
| M353    |                                       |
| M360    |                                       |
| K25-K28 | <b>Peptic ulcer</b>                   |
| G041    | <b>Hemiplegia/ paraplegia</b>         |
| G114    |                                       |
| G801    |                                       |
| G802    |                                       |
| G81     |                                       |
| G82     |                                       |
| G830    |                                       |
| G831    |                                       |
| G832    |                                       |
| G833    |                                       |
| G834    | <b>Diabetes without complications</b> |
| G839    |                                       |
| E100    |                                       |
| E101    |                                       |
| E106    |                                       |
| E108    |                                       |
| E109    |                                       |
| E110    |                                       |
| E111    |                                       |
| E116    |                                       |
| E118    |                                       |
| E119    |                                       |
| E120    |                                       |
| E121    |                                       |
| E126    |                                       |
| E128    |                                       |
| E129    |                                       |
| E130    |                                       |
| E131    |                                       |
| E136    |                                       |
| E138    |                                       |
| E139    |                                       |
| E140    |                                       |
| E141    |                                       |
| E146    |                                       |
| E148    |                                       |



1  
2  
3  
4  
5  
6  
7  
8  
9  
10  
11  
12  
13  
14  
15  
16  
17  
18  
19  
20  
21  
22  
23  
24  
25  
26  
27  
28  
29  
30  
31  
32  
33  
34  
35  
36  
37  
38  
39  
40  
41  
42  
43  
44  
45  
46  
47  
48  
49  
50  
51  
52  
53  
54  
55  
56  
57  
58  
59  
60

|            |                                            |                           |
|------------|--------------------------------------------|---------------------------|
| E149       | <b>Diabetes with chronic complications</b> |                           |
| E102-DE105 |                                            |                           |
| E107       |                                            |                           |
| E112       |                                            |                           |
| E115       |                                            |                           |
| E117       |                                            |                           |
| E122-E125  |                                            |                           |
| E127       |                                            |                           |
| E132-E135  |                                            |                           |
| E137       |                                            |                           |
| E142-E145  |                                            |                           |
| E147       |                                            |                           |
| B18        |                                            | <b>Mild liver disease</b> |
| K700-K703  |                                            |                           |
| K709       |                                            |                           |
| K713-K715  |                                            |                           |
| K717       |                                            |                           |
| K73        |                                            |                           |
| K74        |                                            |                           |
| K760       |                                            |                           |
| K762-K764  |                                            |                           |
| K768       |                                            |                           |
| K769       |                                            |                           |
| Z944       | <b>Moderate/severe liver disease</b>       |                           |
| I850       |                                            |                           |
| I859       |                                            |                           |
| I864       |                                            |                           |
| I982       |                                            |                           |
| K704       |                                            |                           |
| K711       |                                            |                           |
| K721       |                                            |                           |
| K729       | <b>Renal disease</b>                       |                           |
| K765-K767  |                                            |                           |
| I120       |                                            |                           |
| I131       |                                            |                           |
| N032-N037  |                                            |                           |
| N052-N057  |                                            |                           |
| N18        |                                            |                           |
| N19        |                                            |                           |
| N250       |                                            |                           |
| Z490-Z492  |                                            |                           |
| Z940       |                                            |                           |
| Z992       |                                            |                           |

|         |                                            |
|---------|--------------------------------------------|
| C00–C26 | Any malignancy (tumor, leukemia, lymphoma) |
| C30–C34 |                                            |
| C37–C41 |                                            |
| C43     |                                            |
| C45–C58 |                                            |
| C60–C76 |                                            |
| C81–C85 |                                            |
| C88     |                                            |
| C90–C97 |                                            |
| C77–C80 |                                            |
| B20–B22 | HIV/AIDS                                   |
| B24     |                                            |

For peer review only

1  
2  
3  
4  
5  
6  
7  
8  
9  
10  
11  
12  
13  
14  
15  
16  
17  
18  
19  
20  
21  
22  
23  
24  
25  
26  
27  
28  
29  
30  
31  
32  
33  
34  
35  
36  
37  
38  
39  
40  
41  
42  
43  
44  
45  
46  
47  
48  
49  
50  
51  
52  
53  
54  
55  
56  
57  
58  
59  
60

**Appendix 3: SKS-codes for different diagnoses**

Hyperbaric oxygen therapy:

BGXA6\*

Mechanical ventilation:

BGDA0-7

Renal-replacement therapy:

BJFD0, BFJD00, BFJD01, BJFD02

Vasopressor/inotrope:

BFHC93\* (excl. BFHC93E-H)

BFHC92\*

BFHC95

Intensive care unit admission:

NABB, NABE

Septic shock:

R572

A41.9A (+BFHC92, BFHC93 excl. BFHC93E-H, BFHC95)

Amputations:

Upper arm: KNBQ0, KNBQ01, KNBQ02, KNBQ03, KNBQ99

Lower arm: KNCQ19, KNCQ99, KNDQ1, KNDQ1, KNDQ14, KNDQ16, KNDQ17, KNDQ24, KNDQ26, KNDQ27

Hand: KNDQ99

Pelvis: KNEQ99

Upper leg: KNFQ19, KNFQ29B, KNFQ99

Lower leg: KNGQ19, KNGQ99

Foot: KNHQ1, KNHQ11, KNHQ14, KNHQ17, KNHQ99

Penis: KKGCC00-KKGCC10

**The RECORD statement – checklist of items, extended from the STROBE statement, that should be reported in observational studies using routinely collected health data.**

|                           | Item No. | STROBE items                                                                                                                                                                               | Location in manuscript where items are reported | RECORD items                                                                                                                                                                                                                                                                                                                                                                                                                                | Location in manuscript where items are reported                      |
|---------------------------|----------|--------------------------------------------------------------------------------------------------------------------------------------------------------------------------------------------|-------------------------------------------------|---------------------------------------------------------------------------------------------------------------------------------------------------------------------------------------------------------------------------------------------------------------------------------------------------------------------------------------------------------------------------------------------------------------------------------------------|----------------------------------------------------------------------|
| <b>Title and abstract</b> |          |                                                                                                                                                                                            |                                                 |                                                                                                                                                                                                                                                                                                                                                                                                                                             |                                                                      |
|                           | 1        | (a) Indicate the study's design with a commonly used term in the title or the abstract (b) Provide in the abstract an informative and balanced summary of what was done and what was found |                                                 | RECORD 1.1: The type of data used should be specified in the title or abstract. When possible, the name of the databases used should be included.<br><br>RECORD 1.2: If applicable, the geographic region and timeframe within which the study took place should be reported in the title or abstract.<br><br>RECORD 1.3: If linkage between databases was conducted for the study, this should be clearly stated in the title or abstract. | Title, abstract and material and methods (1 <sup>st</sup> paragraph) |
| <b>Introduction</b>       |          |                                                                                                                                                                                            |                                                 |                                                                                                                                                                                                                                                                                                                                                                                                                                             |                                                                      |
| Background rationale      | 2        | Explain the scientific background and rationale for the investigation being reported                                                                                                       |                                                 |                                                                                                                                                                                                                                                                                                                                                                                                                                             | Introduction, paragraph 1-3                                          |
| Objectives                | 3        | State specific objectives, including any prespecified hypotheses                                                                                                                           |                                                 |                                                                                                                                                                                                                                                                                                                                                                                                                                             | Introduction paragraph 4                                             |
| <b>Methods</b>            |          |                                                                                                                                                                                            |                                                 |                                                                                                                                                                                                                                                                                                                                                                                                                                             |                                                                      |
| Study Design              | 4        | Present key elements of study design early in the paper                                                                                                                                    |                                                 |                                                                                                                                                                                                                                                                                                                                                                                                                                             | Title, abstract, Material and Methods 1 <sup>st</sup> paragraph      |
| Setting                   | 5        | Describe the setting, locations, and relevant dates, including                                                                                                                             |                                                 |                                                                                                                                                                                                                                                                                                                                                                                                                                             | Material and Methods 1 <sup>st</sup> paragraph                       |

|                                      |          |                                                                                                                                                                                                                                                                                                                                                                                                                                                                                                                                                                                                                                                                                                                        |  |                                                                                                                                                                                                                                                                                                                                                                                                                                                                                                                                                                                                                                                                                                      |                                                                                                                                                                                                                                                |
|--------------------------------------|----------|------------------------------------------------------------------------------------------------------------------------------------------------------------------------------------------------------------------------------------------------------------------------------------------------------------------------------------------------------------------------------------------------------------------------------------------------------------------------------------------------------------------------------------------------------------------------------------------------------------------------------------------------------------------------------------------------------------------------|--|------------------------------------------------------------------------------------------------------------------------------------------------------------------------------------------------------------------------------------------------------------------------------------------------------------------------------------------------------------------------------------------------------------------------------------------------------------------------------------------------------------------------------------------------------------------------------------------------------------------------------------------------------------------------------------------------------|------------------------------------------------------------------------------------------------------------------------------------------------------------------------------------------------------------------------------------------------|
|                                      |          | <p>periods of recruitment, exposure, follow-up, and data collection</p>                                                                                                                                                                                                                                                                                                                                                                                                                                                                                                                                                                                                                                                |  |                                                                                                                                                                                                                                                                                                                                                                                                                                                                                                                                                                                                                                                                                                      |                                                                                                                                                                                                                                                |
| <p>Participants</p>                  | <p>6</p> | <p>(a) <i>Cohort study</i> - Give the eligibility criteria, and the sources and methods of selection of participants. Describe methods of follow-up<br/> <i>Case-control study</i> - Give the eligibility criteria, and the sources and methods of case ascertainment and control selection. Give the rationale for the choice of cases and controls<br/> <i>Cross-sectional study</i> - Give the eligibility criteria, and the sources and methods of selection of participants</p> <p>(b) <i>Cohort study</i> - For matched studies, give matching criteria and number of exposed and unexposed<br/> <i>Case-control study</i> - For matched studies, give matching criteria and the number of controls per case</p> |  | <p>RECORD 6.1: The methods of study population selection (such as codes or algorithms used to identify subjects) should be listed in detail. If this is not possible, an explanation should be provided.</p> <p>RECORD 6.2: Any validation studies of the codes or algorithms used to select the population should be referenced. If validation was conducted for this study and not published elsewhere, detailed methods and results should be provided.</p> <p>RECORD 6.3: If the study involved linkage of databases, consider use of a flow diagram or other graphical display to demonstrate the data linkage process, including the number of individuals with linked data at each stage.</p> | <p>Material and Methods 2<sup>nd</sup> paragraph (Data collection) includes ICD-10 codes for population selection.</p> <p>Linkage between registries described 1<sup>st</sup> paragraph of Material and Methods. No flow diagram attached.</p> |
| <p>Variables</p>                     | <p>7</p> | <p>Clearly define all outcomes, exposures, predictors, potential confounders, and effect modifiers. Give diagnostic criteria, if applicable.</p>                                                                                                                                                                                                                                                                                                                                                                                                                                                                                                                                                                       |  | <p>RECORD 7.1: A complete list of codes and algorithms used to classify exposures, outcomes, confounders, and effect modifiers should be provided. If these cannot be reported, an explanation should be provided.</p>                                                                                                                                                                                                                                                                                                                                                                                                                                                                               | <p>All variables (ICD-10 codes or SKS-codes) listed in Supplemental Appendix A.</p>                                                                                                                                                            |
| <p>Data sources/<br/>measurement</p> | <p>8</p> | <p>For each variable of interest, give sources of data and details of methods of assessment (measurement).</p>                                                                                                                                                                                                                                                                                                                                                                                                                                                                                                                                                                                                         |  |                                                                                                                                                                                                                                                                                                                                                                                                                                                                                                                                                                                                                                                                                                      | <p>Material and Methods, paragraph 2+3</p>                                                                                                                                                                                                     |

|                        |    |                                                                                                                                                                                                                                                                                                                                                               |  |                                                                                                                                                                                    |
|------------------------|----|---------------------------------------------------------------------------------------------------------------------------------------------------------------------------------------------------------------------------------------------------------------------------------------------------------------------------------------------------------------|--|------------------------------------------------------------------------------------------------------------------------------------------------------------------------------------|
|                        |    | Describe comparability of assessment methods if there is more than one group                                                                                                                                                                                                                                                                                  |  |                                                                                                                                                                                    |
| Bias                   | 9  | Describe any efforts to address potential sources of bias                                                                                                                                                                                                                                                                                                     |  | Material and Methods (last paragraph including statistical analysis). Moreover, potential biases which were not included are addressed in “limitations” section of the discussion. |
| Study size             | 10 | Explain how the study size was arrived at                                                                                                                                                                                                                                                                                                                     |  | -                                                                                                                                                                                  |
| Quantitative variables | 11 | Explain how quantitative variables were handled in the analyses. If applicable, describe which groupings were chosen, and why                                                                                                                                                                                                                                 |  | Material and Methods (statistical analysis)                                                                                                                                        |
| Statistical methods    | 12 | (a) Describe all statistical methods, including those used to control for confounding<br>(b) Describe any methods used to examine subgroups and interactions<br>(c) Explain how missing data were addressed<br>(d) <i>Cohort study</i> - If applicable, explain how loss to follow-up was addressed<br><i>Case-control study</i> - If applicable, explain how |  | Material and Methods (statistical analysis)                                                                                                                                        |

|                                  |    |                                                                                                                                                                                                                                                                                                                                     |  |                                                                                                                                                                                                                                                                                                                         |                                                                                                                 |
|----------------------------------|----|-------------------------------------------------------------------------------------------------------------------------------------------------------------------------------------------------------------------------------------------------------------------------------------------------------------------------------------|--|-------------------------------------------------------------------------------------------------------------------------------------------------------------------------------------------------------------------------------------------------------------------------------------------------------------------------|-----------------------------------------------------------------------------------------------------------------|
|                                  |    | <p>matching of cases and controls was addressed</p> <p><i>Cross-sectional study</i> - If applicable, describe analytical methods taking account of sampling strategy</p> <p>(e) Describe any sensitivity analyses</p>                                                                                                               |  |                                                                                                                                                                                                                                                                                                                         |                                                                                                                 |
| Data access and cleaning methods |    | ..                                                                                                                                                                                                                                                                                                                                  |  | <p>RECORD 12.1: Authors should describe the extent to which the investigators had access to the database population used to create the study population.</p> <p>RECORD 12.2: Authors should provide information on the data cleaning methods used in the study.</p>                                                     | <p>Material and Methods + information on how to retrieve data from DNPR included in “Data Sharing” section.</p> |
| Linkage                          |    | ..                                                                                                                                                                                                                                                                                                                                  |  | <p>RECORD 12.3: State whether the study included person-level, institutional-level, or other data linkage across two or more databases. The methods of linkage and methods of linkage quality evaluation should be provided.</p>                                                                                        | <p>Material and Methods 1<sup>st</sup> paragraph (Person-level)</p>                                             |
| <b>Results</b>                   |    |                                                                                                                                                                                                                                                                                                                                     |  |                                                                                                                                                                                                                                                                                                                         |                                                                                                                 |
| Participants                     | 13 | <p>(a) Report the numbers of individuals at each stage of the study (<i>e.g.</i>, numbers potentially eligible, examined for eligibility, confirmed eligible, included in the study, completing follow-up, and analysed)</p> <p>(b) Give reasons for non-participation at each stage.</p> <p>(c) Consider use of a flow diagram</p> |  | <p>RECORD 13.1: Describe in detail the selection of the persons included in the study (<i>i.e.</i>, study population selection) including filtering based on data quality, data availability and linkage. The selection of included persons can be described in the text and/or by means of the study flow diagram.</p> | <p>Material and Methods (Data Collection).</p>                                                                  |

|                                                                                                    |                  |    |                                                                                                                                                                                                                                                                                                                                                                                                                          |  |                                                                          |
|----------------------------------------------------------------------------------------------------|------------------|----|--------------------------------------------------------------------------------------------------------------------------------------------------------------------------------------------------------------------------------------------------------------------------------------------------------------------------------------------------------------------------------------------------------------------------|--|--------------------------------------------------------------------------|
| 1<br>2<br>3<br>4<br>5<br>6<br>7<br>8<br>9<br>10<br>11<br>12                                        | Descriptive data | 14 | (a) Give characteristics of study participants ( <i>e.g.</i> , demographic, clinical, social) and information on exposures and potential confounders<br>(b) Indicate the number of participants with missing data for each variable of interest<br>(c) <i>Cohort study</i> - summarise follow-up time ( <i>e.g.</i> , average and total amount)                                                                          |  | Results 1 <sup>st</sup> paragraph + Table 1                              |
| 13<br>14<br>15<br>16<br>17<br>18<br>19<br>20<br>21<br>22<br>23                                     | Outcome data     | 15 | <i>Cohort study</i> - Report numbers of outcome events or summary measures over time<br><i>Case-control study</i> - Report numbers in each exposure category, or summary measures of exposure<br><i>Cross-sectional study</i> - Report numbers of outcome events or summary measures                                                                                                                                     |  | Results section, Table 1+2                                               |
| 24<br>25<br>26<br>27<br>28<br>29<br>30<br>31<br>32<br>33<br>34<br>35<br>36<br>37<br>38<br>39<br>40 | Main results     | 16 | (a) Give unadjusted estimates and, if applicable, confounder-adjusted estimates and their precision ( <i>e.g.</i> , 95% confidence interval). Make clear which confounders were adjusted for and why they were included<br>(b) Report category boundaries when continuous variables were categorized<br>(c) If relevant, consider translating estimates of relative risk into absolute risk for a meaningful time period |  | Results + subsection "Mortality" including adjusted estimates + Table 4. |
| 41<br>42<br>43                                                                                     | Other analyses   | 17 | Report other analyses done— <i>e.g.</i> , analyses of subgroups and                                                                                                                                                                                                                                                                                                                                                      |  | -                                                                        |

44  
45  
46  
47



|                                                           |    |                                                                                                                                                                            |  |                                                                                                                                                                                                                                                                                                          |                                                                                                      |
|-----------------------------------------------------------|----|----------------------------------------------------------------------------------------------------------------------------------------------------------------------------|--|----------------------------------------------------------------------------------------------------------------------------------------------------------------------------------------------------------------------------------------------------------------------------------------------------------|------------------------------------------------------------------------------------------------------|
|                                                           |    | interactions, and sensitivity analyses                                                                                                                                     |  |                                                                                                                                                                                                                                                                                                          |                                                                                                      |
| <b>Discussion</b>                                         |    |                                                                                                                                                                            |  |                                                                                                                                                                                                                                                                                                          |                                                                                                      |
| Key results                                               | 18 | Summarise key results with reference to study objectives                                                                                                                   |  |                                                                                                                                                                                                                                                                                                          | Discussion 1 <sup>st</sup> + 2 <sup>nd</sup> paragraph.                                              |
| Limitations                                               | 19 | Discuss limitations of the study, taking into account sources of potential bias or imprecision. Discuss both direction and magnitude of any potential bias                 |  | RECORD 19.1: Discuss the implications of using data that were not created or collected to answer the specific research question(s). Include discussion of misclassification bias, unmeasured confounding, missing data, and changing eligibility over time, as they pertain to the study being reported. | Discussion paragraph 8 “limitations”                                                                 |
| Interpretation                                            | 20 | Give a cautious overall interpretation of results considering objectives, limitations, multiplicity of analyses, results from similar studies, and other relevant evidence |  |                                                                                                                                                                                                                                                                                                          | Discussion, entire section.                                                                          |
| Generalisability                                          | 21 | Discuss the generalisability (external validity) of the study results                                                                                                      |  |                                                                                                                                                                                                                                                                                                          | Discussion paragraph 8.                                                                              |
| <b>Other Information</b>                                  |    |                                                                                                                                                                            |  |                                                                                                                                                                                                                                                                                                          |                                                                                                      |
| Funding                                                   | 22 | Give the source of funding and the role of the funders for the present study and, if applicable, for the original study on which the present article is based              |  |                                                                                                                                                                                                                                                                                                          | Subsection “Funding Sources”                                                                         |
| Accessibility of protocol, raw data, and programming code |    | ..                                                                                                                                                                         |  | RECORD 22.1: Authors should provide information on how to access any supplemental information such as the study protocol, raw data, or programming code.                                                                                                                                                 | Supplemental information (including ICD-10 + SKS-codes in Supplemental Appendix). How to access DNPR |

|  |  |  |  |  |                    |
|--|--|--|--|--|--------------------|
|  |  |  |  |  | in “Data Sharing”. |
|--|--|--|--|--|--------------------|

1  
2  
3  
4 \*Reference: Benchimol EI, Smeeth L, Guttman A, Harron K, Moher D, Petersen I, Sørensen HT, von Elm E, Langan SM, the RECORD Working  
5 Committee. The REporting of studies Conducted using Observational Routinely-collected health Data (RECORD) Statement. *PLoS Medicine* 2015;  
6 in press.  
7

8 \*Checklist is protected under Creative Commons Attribution ([CC BY](https://creativecommons.org/licenses/by/4.0/)) license.  
9  
10  
11  
12  
13  
14  
15  
16  
17  
18  
19  
20  
21  
22  
23  
24  
25  
26  
27  
28  
29  
30  
31  
32  
33  
34  
35  
36  
37  
38  
39  
40  
41  
42  
43  
44  
45  
46  
47

For peer review only
