# Supplementary material for: Incidence, comorbidity and mortality in patients with necrotising soft-tissue infections, 2005–2018: a Danish nationwide register-based cohort study
Source: PubMed Central journal article supplement — BMJ Open. 2020 Oct 16;10(10):e041302. doi: 10.1136/bmjopen-2020-041302 (PMC7569942; doi:10.1136/bmjopen-2020-041302), 2020-10-16
Supplement: bmjopen-2020-041302supp002.pdf [file bmjopen-2020-041302supp002.pdf]

**Appendix 2: ICD-10 codes for Charlson Comorbidity Index**

|           |                           |                             |
|-----------|---------------------------|-----------------------------|
| I21       | Myocardial infarction     |                             |
| I22       |                           |                             |
| I252      |                           |                             |
| I099      | Congestive heart failure  |                             |
| I110      |                           |                             |
| I130      |                           |                             |
| I132      |                           |                             |
| I255      |                           |                             |
| I420      |                           |                             |
| I425–I429 |                           |                             |
| I43       |                           |                             |
| I50       |                           |                             |
| P290      |                           |                             |
| I70       |                           | Peripheral vascular disease |
| I71       |                           |                             |
| I731      |                           |                             |
| I738      |                           |                             |
| I739      |                           |                             |
| I771      |                           |                             |
| I790      |                           |                             |
| I792      |                           |                             |
| K551      |                           |                             |
| K558      |                           |                             |
| K559      |                           |                             |
| Z958      |                           |                             |
| Z959      |                           |                             |
| G45       | Cerebrovascular disease   |                             |
| G46       |                           |                             |
| I60–I69   |                           |                             |
| H340      |                           |                             |
| F00–F03   | Dementia                  |                             |
| G30       |                           |                             |
| F051      |                           |                             |
| G311      |                           |                             |
| I278      | Chronic pulmonary disease |                             |
| I279      |                           |                             |
| J40–J47   |                           |                             |
| J60–J67   |                           |                             |
| J684      |                           |                             |
| J701      |                           |                             |
| J703      |                           |                             |
| M05       | Rheumatologic disease     |                             |

|         |                               |                                       |
|---------|-------------------------------|---------------------------------------|
| M06     |                               |                                       |
| M315    |                               |                                       |
| M32–M34 |                               |                                       |
| M351    |                               |                                       |
| M353    |                               |                                       |
| M360    |                               |                                       |
| K25–K28 | <b>Peptic ulcer</b>           |                                       |
| G041    | <b>Hemiplegia/ paraplegia</b> |                                       |
| G114    |                               |                                       |
| G801    |                               |                                       |
| G802    |                               |                                       |
| G81     |                               |                                       |
| G82     |                               |                                       |
| G830    |                               |                                       |
| G831    |                               |                                       |
| G832    |                               |                                       |
| G833    |                               |                                       |
| G834    |                               |                                       |
| G839    |                               |                                       |
| E100    |                               | <b>Diabetes without complications</b> |
| E101    |                               |                                       |
| E106    |                               |                                       |
| E108    |                               |                                       |
| E109    |                               |                                       |
| E110    |                               |                                       |
| E111    |                               |                                       |
| E116    |                               |                                       |
| E118    |                               |                                       |
| E119    |                               |                                       |
| E120    |                               |                                       |
| E121    |                               |                                       |
| E126    |                               |                                       |
| E128    |                               |                                       |
| E129    |                               |                                       |
| E130    |                               |                                       |
| E131    |                               |                                       |
| E136    |                               |                                       |
| E138    |                               |                                       |
| E139    |                               |                                       |
| E140    |                               |                                       |
| E141    |                               |                                       |
| E146    |                               |                                       |
| E148    |                               |                                       |

|            |                                            |
|------------|--------------------------------------------|
| E149       | <b>Diabetes with chronic complications</b> |
| E102-DE105 |                                            |
| E107       |                                            |
| E112       |                                            |
| E115       |                                            |
| E117       |                                            |
| E122-E125  |                                            |
| E127       |                                            |
| E132-E135  |                                            |
| E137       |                                            |
| E142-E145  |                                            |
| E147       |                                            |
| B18        |                                            |
| K700-K703  |                                            |
| K709       |                                            |
| K713-K715  |                                            |
| K717       |                                            |
| K73        |                                            |
| K74        |                                            |
| K760       |                                            |
| K762-K764  |                                            |
| K768       |                                            |
| K769       |                                            |
| Z944       |                                            |
| I850       | <b>Moderate/severe liver disease</b>       |
| I859       |                                            |
| I864       |                                            |
| I982       |                                            |
| K704       |                                            |
| K711       |                                            |
| K721       |                                            |
| K729       |                                            |
| K765-K767  |                                            |
| I120       | <b>Renal disease</b>                       |
| I131       |                                            |
| N032-N037  |                                            |
| N052-N057  |                                            |
| N18        |                                            |
| N19        |                                            |
| N250       |                                            |
| Z490-Z492  |                                            |
| Z940       |                                            |
| Z992       |                                            |

|         |                                            |
|---------|--------------------------------------------|
| C00-C26 | Any malignancy (tumor, leukemia, lymphoma) |
| C30-C34 |                                            |
| C37-C41 |                                            |
| C43     |                                            |
| C45-C58 |                                            |
| C60-C76 |                                            |
| C81-C85 |                                            |
| C88     |                                            |
| C90-C97 |                                            |
| C77-C80 | Metastatic solid tumor                     |
| B20-B22 | HIV/AIDS                                   |
| B24     |                                            |
