# Supplementary material for: Incidence, comorbidity and mortality in patients with necrotising soft-tissue infections, 2005–2018: a Danish nationwide register-based cohort study
Source: PubMed Central journal article supplement — BMJ Open. 2020 Oct 16;10(10):e041302. doi: 10.1136/bmjopen-2020-041302 (PMC7569942; doi:10.1136/bmjopen-2020-041302), 2020-10-16
Supplement: bmjopen-2020-041302supp003.pdf [file bmjopen-2020-041302supp003.pdf]

**Appendix 3: SKS-codes for different diagnoses**

Hyperbaric oxygen therapy:

BGXA6\*

Mechanical ventilation:

BGDA0-7

Renal-replacement therapy:

BJFD0, BFJD00, BFJD01, BJFD02

Vasopressor/inotrope:

BFHC93\* (excl. BFHC93E-H)

BFHC92\*

BFHC95

Intensive care unit admission:

NABB, NABE

Septic shock:

R572

A41.9A (+BFHC92, BFHC93 excl. BFHC93E-H, BFHC95)

Amputations:

Upper arm: KNBQ0, KNBQ01, KNBQ02, KNBQ03, KNBQ99

Lower arm: KNCQ19, KNCQ99, KNDQ1, KNDQ1, KNDQ14, KNDQ16, KNDQ17, KNDQ24, KNDQ26, KNDQ27

Hand: KNDQ99

Pelvis: KNEQ99

Upper leg: KNFQ19, KNFQ29B, KNFQ99

Lower leg: KNGQ19, KNGQ99

Foot: KNHQ1, KNHQ11, KNHQ14, KNHQ17, KNHQ99

Penis: KKG00-KKG10
